# Supplementary material
Source: HighWire-hosted journal article supplement (https://www.cmajopen.ca/highwire/filestream/81298/field_highwire_adjunct_files/2/2019-0014-original-submission.pdf)
Supplement: 2019-0014-original-submission.pdf [file 2019-0014-original-submission.pdf]

## Prenatal bed rest: A meta-analysis

Brittany Matenchuk BSc,<sup>1</sup> Rshmi Khurana MD,<sup>2</sup> Chenxi Cai PhD<sup>3</sup>, Normand G. Boulé PhD,<sup>4</sup> Linda Slater MLIS<sup>5</sup> and Margie H. Davenport PhD<sup>6</sup>

<sup>1</sup>Department of Pediatrics, Faculty of Medicine & Dentistry, Program for Pregnancy and Postpartum Health, Physical Activity and Diabetes Laboratory, University of Alberta, Edmonton, Alberta, Canada

<sup>2</sup>Department of Medicine and Department of Obstetrics & Gynecology, University of Alberta, Edmonton, Canada

<sup>3</sup> Program for Pregnancy and Postpartum Health, Faculty of Kinesiology, Sport, and Recreation, Women and Children's Health Research Institute, University of Alberta, Edmonton, Alberta, Canada.

<sup>4</sup> Physical Activity and Diabetes Laboratory, Faculty of Kinesiology, Sport, and Recreation, Alberta Diabetes Institute, University of Alberta, Edmonton, Alberta, Canada

<sup>5</sup> John W. Scott Health Sciences Library, University of Alberta, Edmonton, Alberta, Canada

<sup>6</sup> Program for Pregnancy and Postpartum Health, Physical Activity and Diabetes Laboratory, Faculty of Kinesiology, Sport, and Recreation, Women and Children's Health Research Institute, Alberta Diabetes Institute, University of Alberta, Edmonton, Alberta, Canada.

### Corresponding Author

Margie H. Davenport, PhD  
Email: [margie.davenport@ualberta.ca](mailto:margie.davenport@ualberta.ca)

### Funding:

Funding for this project is made possible by the Advancing Women's Heart Health Initiative supported by Health Canada and the Heart and Stroke Foundation of Canada. This research was also funded by generous supporters of the Lois Hole Hospital for Women through the Women and Children's Health Research Institute.

### Declaration of interests

The authors have no conflicts of interest to report.

1  
2  
3 **42 ABSTRACT**

4 **43 BACKGROUND:** Bed rest is prescribed by 71-95% of maternity health care professionals for  
5  
6 **44** high-risk pregnancy complications. We synthesized evidence from randomized controlled trials  
7  
8  
9 **45** to quantify the influence of maternal bed rest on maternal/fetal health outcomes in developed and  
10  
11 **46** undeveloped regions.

12  
13 **47 METHODS:** A structured search was conducted through MEDLINE, EMBASE, CINAHL, Web  
14  
15  
16 **48** of Science, Ovid's Cochrane Central Register of Controlled Trials and Cochrane Database of  
17  
18 **49** Systematic Reviews and ClinicalTrials.gov up to August 22, 2018. RCTs comparing standard  
19  
20 **50** care to standard care plus bed rest after 20 weeks gestation were assessed.

21  
22 **51 RESULTS:** Our search identified 767 publications of which 71 were assessed for eligibility.  
23  
24  
25 **52** Sixteen publications reporting on fourteen unique studies (2,608 women, 3,328 fetuses) were  
26  
27 **53** included in the analysis. Overall, maternal/newborn outcomes were similar between groups;  
28  
29 **54** however, there was a 40g greater birth weight with bed rest (Weighted Mean Difference  
30  
31 **55** [WMD]: 40g, 95% confidence interval [CI]: -30g, 110g,  $I^2=31%$ ). In subgroup analyses between  
32  
33 **56** developed and undeveloped regions, divergent effects were observed. Gestational length was  
34  
35 **57** shorter with bed rest in developed regions (WMD: -0.77 weeks, 95% CI: -1.26, -0.27,  $I^2=0%$ ).  
36  
37  
38 **58** The odds of a very premature birth (Odds Ratio [OR]: 2.69, 95% CI: 1.19, 6.07,  $I^2=0%$ ) and  
39  
40 **59** having a newborn <1500g (OR: 1.93, 95% CI: 1.00, 3.70,  $I^2=0%$ ) were also increased in  
41  
42 **60** developed regions.

43  
44  
45 **61 INTERPRETATION:** In developed regions, treatment of complicated pregnancies with  
46  
47 **62** prolonged bed rest results in worse newborn outcomes.  
48  
49

50 **63**

51 **64**

52 **65**

## 66 **Introduction**

67  
68 Bed rest and activity restriction is prescribed to approximately 20% of pregnant women with the  
69 intent of improving maternal/fetal health outcomes of high-risk pregnancies complicated by  
70 preterm labour, intrauterine growth restriction and hypertension<sup>1-3</sup>. It is associated with an  
71 economic cost of up to 7 billion dollars per year in the United States alone (including  
72 hospitalization, lost wages, and lost domestic productivity)<sup>1,4</sup>. However, strong evidence  
73 suggests prolonged bed rest negatively impacts maternal health (linked to anxiety, depression,  
74 gestational diabetes, muscle atrophy, bone loss and venous thromboembolism) and there is little  
75 evidence of improved pregnancy outcomes<sup>5-7</sup>. Despite the lack of evidence bed rest continues to  
76 be prescribed by up to 95% of clinicians<sup>1,8</sup>. This has resulted in an urgent call for additional  
77 research to elucidate the potential benefits (or harms) of bed rest for the mother and fetus by the  
78 World Health Organization and the American College of Obstetricians and Gynecologists<sup>8-10</sup>.  
79 We conducted a systematic review and meta-analysis of randomized, controlled trials (RCTs)  
80 which contrasted bed rest or activity restriction in conjunction with standard care versus standard  
81 care alone (no bed rest) in pregnant women  $\geq 20$  weeks gestation on maternal/fetal health  
82 outcomes.

83

## 84 **Methods**

### 85 *Eligibility Criteria*

86 This review was conducted in accordance with the PRISMA guidelines<sup>11</sup> and registered with the  
87 PROSPERO database (Registration number: CRD42018099237). Inclusion criteria (defined *a*  
88 *priori*) were: RCTs in pregnant women comparing standard care (including tocolytics, anti-  
89 hypertensive medications) plus bed rest (including activity restriction; hospitalized or at home)

1  
2  
3  
4  
5  
6  
7  
8  
9  
10  
11  
12  
13  
14  
15  
16  
17  
18  
19  
20  
21  
22  
23  
24  
25  
26  
27  
28  
29  
30  
31  
32  
33  
34  
35  
36  
37  
38  
39  
40  
41  
42  
43  
44  
45  
46  
47  
48  
49  
50  
51  
52  
53  
54  
55  
56  
57  
58  
59  
60

90 versus standard care without activity restriction (no bed rest). Trials were eligible if they  
91 included women who were  $\geq 20$  weeks gestation. Bed rest was defined as a prescribed restriction  
92 of activity encompassing the majority of waking hours for  $\geq 1$  week<sup>5</sup>. Fetal outcomes included  
93 birth weight, small at birth (birth weight  $< 1500$  g and  $< 2500$ g), or small for gestational age  
94 (SGA: less than the 10<sup>th</sup> percentile for gestational age and sex), gestational age, premature  
95 delivery ( $< 37$  weeks at birth), very premature delivery (as defined by the author  $< 35$ ,  $< 34$  or  $< 32$   
96 weeks at birth), perinatal death and admission to the neonatal intensive care unit (NICU).  
97 Maternal outcomes included preterm rupture of membranes (PROM), Pregnancy-Induce  
98 Hypertension (PIH), pre-eclampsia, and gestational diabetes mellitus (GDM). Studies were not  
99 excluded due to language of publication or publication format (e.g., abstracts only).

#### 100 101 *Information sources*

102  
103 A structured search was conducted through MEDLINE, EMBASE, CINAHL, Web of Science,  
104 Ovid's Cochrane Central Register of Controlled Trials and Cochrane Database of Systematic  
105 Reviews and ClinicalTrials.gov up to and including August 22, 2018 (see Online Supplement for  
106 complete search strategy).

#### 107 108 *Study selection and data extraction*

109 Records identified by the search strategy were independently assessed for inclusion by BAM or  
110 CC and MHD, with NGB acting as arbitrator in the event of disagreement. The most recent or  
111 complete version from multiple publications of the same trial was selected. Data from included  
112 studies were extracted independently by BAM and MHD using a standardized data collection  
113 form including: the above described outcomes of interest, as well as maternal age, height, body  
114 mass index (BMI) at study entry, and existing conditions (i.e., GDM, maternal hypertension,

1  
2  
3 115 PRM), sample size, indication for bed rest, duration of bed rest, location of bed rest and no bed  
4  
5 116 rest groups (e.g., hospital versus home) and any co-interventions used.

6  
7  
8 117

9  
10 118 *Quality measures and risk of bias*

11  
12 119 The risk of bias in RCTs were assessed following the Cochrane Handbook<sup>12</sup>. All studies were  
13  
14 120 screened for potential sources of bias including selection bias, reporting bias, performance bias,  
15  
16 121 detection bias, attrition bias and “other” sources of bias. Risk of bias across studies was rated as  
17  
18 122 "serious" when studies having the greatest influence on the pooled result [assessed using weight  
19  
20 123 (%) given in forest plots] presented “high” risk of bias. The quality of the evidence was assessed  
21  
22 124 using the Grading of Recommendations Assessment, Development and Evaluation (GRADE)  
23  
24 125 system. Evidence from RCTs began with a high quality evidence by default, and then were  
25  
26 126 downgraded or upgraded based on pre-specified criteria. Criteria to downgrade included study  
27  
28 127 limitations (weight of studies showed serious risk of bias), inconsistency (heterogeneity was high  
29  
30 128 [ $I^2 \geq 50\%$ ] or when only one study was assessed), indirectness (bed rest-only interventions and  
31  
32 129 bed rest + co-interventions were combined for analysis), imprecision (the 95% CI crossed the  
33  
34 130 line of no effect, and was wide) and publication bias (significant evidence of small-study  
35  
36 131 effects).

37  
38 132

39  
40 133 *Statistical analysis*

41  
42 134 Statistical analyses were conducted using Review Manager v5.2. (Cochrane Collaboration,  
43  
44 135 Copenhagen, Denmark). For continuous outcomes, mean differences between bed rest and no  
45  
46 136 bed rest groups were examined. For binary outcomes, odds ratios were calculated. Inverse-

1  
2  
3 137 variance weighting was applied to obtain pooled weighted mean differences (WMD) and odds  
4  
5 138 ratios (OR) using a random effect model.  
6  
7

8 139  
9  
10 140 A sensitivity analysis was performed to evaluate whether the effects were different when  
11  
12 141 examining relationships between the different indications for bed rest and maternal/infant  
13  
14 142 outcomes. When possible, the following *a priori* determined subgroup analyses were conducted:  
15  
16 143 1) developmental status of the region in the year the study took place based on the world Bank  
17  
18 144 country definition in the World Development Indicators database. These definitions intend to  
19  
20 145 reflect basic economic region conditions<sup>13</sup>. 2) Single versus multiple gestation pregnancies. Chi-  
21  
22 146 squared tests were used to estimate heterogeneity between trials. The percent of total variability  
23  
24 147 that is attributable to heterogeneity (i.e., not to chance) was expressed as the I-squared ( $I^2$ ). When  
25  
26 148 possible, missing standard deviations (SD) for outcomes were estimated from reported p-  
27  
28 149 values<sup>14</sup>, according to Cochrane Handbook procedures (section 7.7.3.3<sup>12</sup>).  
29  
30  
31  
32

33 150

## 35 151 **Results**

### 37 152 *Study selection*

39  
40 153 Sixteen articles from 14 individual randomized controlled trials met our inclusion criteria (see  
41  
42 154 Figure 1). When multiple publications from the same trial were identified, the article with the  
43  
44 155 most complete datasets was selected for extraction.  
45  
46

47 156

### 49 157 *Study characteristics*

51  
52 158 The 14 studies assessed in our analysis included 2,608 pregnancies (3,328 newborns) including  
53  
54 159 nine from developed and five from undeveloped regions. While the studies in developed regions  
55  
56  
57  
58  
59  
60

1  
2  
3 160 were from diverse regions around the world, all five trials from undeveloped regions were  
4  
5 161 conducted in Zimbabwe<sup>15-19</sup>. Indications for bed rest included multiple gestation pregnancy<sup>15-20</sup>,  
6  
7 162 maternal hypertension or pre-eclampsia<sup>15-19</sup>, and PROM<sup>15-17</sup>. Studies evaluating pregnancies in  
8  
9 163 developed regions examined multiple gestation pregnancy<sup>20-22</sup>, maternal hypertension<sup>20,22-24</sup>,  
10  
11 164 preterm labour<sup>25,26</sup>, suspected intrauterine growth restriction (IUGR)<sup>27</sup> and PROM, where women  
12  
13 165 were not excluded if they had concurrent maternal hypertension or GDM<sup>28</sup>.  
14  
15  
16  
17 166

18  
19 167 The length of the prescribed bed rest was reported in 9 studies and ranged from 1.0 to 9.7  
20  
21 168 weeks<sup>15-19,22,24,26,28</sup>. Five studies did not report the duration of bed rest<sup>20,21,23,25,27</sup>. One study had  
22  
23 169 two interventions, one involving a sedation component in both bed rested and non-bed rested  
24  
25 170 groups and one without sedation in both groups<sup>23</sup>. Women who were randomized to the non-bed  
26  
27 171 rest group were not prescribed activity restriction but otherwise received standard prenatal care.  
28  
29 172 A summary of study characteristics is provided in Online Supplement Table 1.  
30  
31  
32  
33 173

#### 34 35 174 *Quality of evidence*

36  
37  
38 175 Overall, the quality of evidence ranged from “low” to “high” (See Online Supplement Table 2).  
39  
40 176 The most common reasons for downgrading the quality of evidence were 1) serious risk of bias,  
41  
42 177 and 2) serious imprecision of the interventions. Common sources of bias included selection bias  
43  
44 178 due to inadequate generation of a randomised sequence and reporting bias due to selective  
45  
46 179 outcome reporting.  
47  
48  
49

50 180

#### 51 52 181 *Synthesis of results*

1  
2  
3 182 Overall, there was “moderate” quality evidence from 14 RCTs (1,995 births: 782 in developed  
4  
5 183 regions and 1,213 in undeveloped regions) regarding the association between bed rest and  
6  
7 184 perinatal death. The quality of evidence was downgraded from “high” to “moderate” because of  
8  
9  
10 185 serious imprecision of the intervention. Bed rest did not decrease the overall risk of perinatal  
11  
12 186 death (OR: 1.09, 95% CI: 0.50 to 2.37,  $I^2 = 38\%$ ; See Figure 2), or when separated by  
13  
14 187 developmental status of the country ( $p=0.30$ ).  
15  
16  
17 188

18  
19 189 When gestational age at birth was considered as a continuous variable, “high” quality evidence  
20  
21 190 revealing there was no difference between bed rest and no bed rest groups (WMD: -0.28 weeks,  
22  
23 191 95% CI: -0.61 to 0.05,  $I^2 = 30\%$ ). However, in developed regions, mothers who were on bed rest  
24  
25 192 delivered babies at an earlier gestational age (WMD: -0.77 weeks, 95% CI: -1.26 to -0.27,  $I^2 =$   
26  
27 193 0%; “moderate” evidence) but not undeveloped regions (WMD: -0.04 weeks, 95% CI: -0.35 to  
28  
29 194 0.26,  $I^2=6\%$ ;  $P=0.01$  for subgroup differences see Figure 3; “high” evidence). Our analysis of  
30  
31 195 prematurity (<37 weeks) included 2,476 pregnancies. No difference was found between rate of  
32  
33 196 prematurity for women on bed rest versus no bed rest (OR: 1.00, 95% CI: 0.78 to 1.30,  $I^2=12\%$ ;  
34  
35 197 “low” evidence) and subgroup analyses were not significant (see Online Supplement Figure 1).  
36  
37  
38 198 No difference also was found between rate of very prematurity (<34 weeks) for women on bed  
39  
40 199 rest versus no bed rest (OR: 1.26, 95% CI: 0.80 to 2.00,  $I^2=0\%$ ; “moderate” evidence). However,  
41  
42 200 bed rest increased the risk of very premature births for women in developed regions (OR: 2.69,  
43  
44 201 95% CI: 1.19 to 6.07,  $I^2=0\%$ ; “moderate” evidence) but not undeveloped regions (OR: 0.88,  
45  
46 202 95% CI: 0.50 to 1.54,  $I^2=0\%$ ; see Figure 4;  $P=0.03$  for subgroup differences; “moderate”  
47  
48 203 evidence).  
49  
50  
51 204  
52  
53  
54  
55  
56  
57  
58  
59  
60



1  
2  
3 205 There was “high” quality evidence revealing bed rest was associated with a greater birth weight  
4  
5 206 compared to the no bed rest group (WMD: 40g, 95% CI: -30g to 110g,  $I^2=31%$ ; see Figure 5).  
6  
7 207 Subgroup analysis identified bed rest had no impact on birth weight in developed regions  
8  
9 208 (WMD: -40g, 95% CI: -140g to 60g,  $I^2=17%$ ; “moderate” evidence) but increased birth weight in  
10  
11 209 undeveloped regions (WMD: 100g, 95% CI: 40g to 170g,  $I^2=0%$ ;  $P=0.002$  for subgroup  
12  
13 210 differences; “high” evidence).  
14  
15 211

16  
17 212 Overall, “moderate” quality evidence indicating bed rest did not decrease the risk of birth weight  
18  
19 213 <2500 grams (OR: 0.84, 95% CI: 0.69 to 1.03,  $I^2=0%$ ). However, in undeveloped regions bed  
20  
21 214 rest decreased the risk of delivering a baby <2500 grams (OR: 0.78, 95% CI: 0.61 to 1.00,  
22  
23 215  $I^2=0%$ ; see Online Supplement Figure 2; “high” evidence) but not developed regions (OR: 1.01,  
24  
25 216 95% CI: 0.69 to 1.49,  $I^2=8%$ ;  $P=0.26$  for subgroup differences; “low” evidence)  
26  
27  
28  
29

30  
31 217  
32  
33 218 The risk of delivering a newborn <1500g was similar between the bed rest and no bed rest  
34  
35 219 groups (OR: 1.29, 95% CI: 0.69 to 2.40,  $I^2=19%$ , see Online Supplement Figure 3; “low”  
36  
37 220 evidence). Subgroup analyses were not statistically significant ( $P=0.08$ ).  
38  
39

40 221  
41  
42 222 The risk of having a SGA newborn was similar between bed rest and no bed rest groups (OR:  
43  
44 223 0.84, 95% CI: 0.62 to 1.12,  $I^2=0%$ ; see Online Supplement Figure 4; “moderate” evidence), even  
45  
46 224 after examining pregnancies in developed (OR: 1.10, 95% CI: 0.43 to 2.81,  $I^2=9%$ ; “moderate”  
47  
48 225 evidence), or undeveloped regions (OR: 0.81, 95% CI: 0.59 to 1.10,  $I^2=0%$ ; “moderate”  
49  
50 226 evidence). Subgroup analyses were not statistically significant.  
51  
52  
53

54 227  
55  
56  
57  
58  
59  
60

1  
2  
3 228 Bed rest did not reduce the rate of admission to NICU (OR: 0.88, 95% CI: 0.67 to 1.16,  $I^2=0\%$ ;  
4  
5 229 see Online Supplement Figure 5; “moderate” evidence). Subgroup analyses were not statistically  
6  
7  
8 230 significant.

9  
10 231  
11  
12 232 Overall, there was “low” quality evidence from 10 RCTs (n=963) regarding the association  
13  
14 233 between bed rest and C-section. The quality of evidence was downgraded from “high” to “low”  
15  
16 234 because of serious risk of bias and serious imprecision of the intervention. The pooled estimate  
17  
18 235 indicated bed rest did not reduce the rate of C-section (OR 1.04, 95% CI 0.66, 1.63,  $I^2 = 32\%$ ; see  
19  
20 236 Online Supplement Figure 6). Subgroup analyses were not statistically significant.  
21  
22  
23

24 237  
25  
26 238 Six RCTs (n=559) with “low” quality evidence indicating bed rest did not reduce odds of  
27  
28 239 developing gestational hypertension (OR 0.74, 95% CI 0.28, 1.96,  $I^2 = 0\%$ ; Online Supplement  
29  
30 240 Figure 7). Subgroup analyses were not statistically significant. One “moderate” quality RCT  
31  
32 241 (downgraded due to serious inconsistency), found bed rest also did not reduce the rate of pre-  
33  
34 242 eclampsia (OR 0.57, 95% CI 0.16, 1.99; see Online Supplement Figure 8).  
35  
36  
37

38 243  
39  
40 244 Four RCTs with “moderate evidence” indicated bed rest did not reduce the rate of PRM (OR  
41  
42 245 1.46, 95% CI 0.83, 2.57,  $I^2 = 0\%$ ; Online Supplement Figure 9). Subgroup analyses were not  
43  
44 246 statistically significant.  
45  
46

47 247  
48  
49 248 One “moderate” quality RCT (downgraded due to serious inconsistency), found bed rest did not  
50  
51 249 reduce the rate of GDM (OR 1.05, 95% CI 0.20, 5.37; see Online Supplement Figure 10).  
52  
53

54 250  
55  
56  
57  
58  
59  
60

1  
2  
3 251 Eight out of 14 studies included multiple gestation pregnancies. When stratified for singleton or  
4  
5 252 multiple gestation, perinatal death, prematurity <37 weeks, gestational age, birth weight <1500g,  
6  
7 253 birth weight <2500g, small for gestational age, cesarean section, and admission to NICU were  
8  
9  
10 254 similar between non-bed rested and bed rested groups (see Online Supplement Figure 11).

11  
12 255  
13 256 **Interpretation**

15  
16 257 This meta-analysis of 2,608 pregnancies (3,328 newborns) analyzed the influence of prenatal bed  
17  
18 258 rest or activity restriction on maternal/fetal health outcomes. Overall, maternal and fetal  
19  
20 259 outcomes were similar between bed rest and no bed rest. However, when stratified by  
21  
22 260 developmental status of the region there was a divergent impact of bed rest between groups such  
23  
24 261 that bed rest in developed regions decreased gestational age, increased the risk of delivering a  
25  
26 262 very premature baby and increased the risk of delivering a baby <1500g. In contrast, bed rest in  
27  
28 263 undeveloped regions increased birth weight by 100g and decreased the risk of delivering a baby  
29  
30 264 <2500g.

31  
32 265  
33  
34 266 Preterm birth (<37 weeks) and very preterm birth are leading causes of perinatal morbidity and  
35  
36 267 mortality<sup>29</sup>. In the studies included in our meta-analysis, very premature was defined as <32  
37  
38 268 weeks<sup>18,22</sup>, <34 weeks<sup>15-17,20</sup> and <35 weeks<sup>23,26</sup>. Our analysis indicates that in developed  
39  
40 269 regions, bed rest increases the odds of having a very premature baby by 169%. Further, women  
41  
42 270 placed on prenatal bed rest in developed regions were twice as likely to deliver a baby <1500g  
43  
44 271 compared to women who were not placed on bed rest. This finding is in line with other data that  
45  
46 272 infants whose mothers were prescribed bed rest had an increased risk of fetal growth  
47  
48 273 restriction.<sup>33</sup> The primary indication for bed rest is to prolong gestation and promote  
49  
50 274 development towards term; however, the findings of our meta-analysis do not support the use of  
51  
52  
53  
54  
55  
56  
57  
58  
59  
60

1  
2  
3 275 bed rest to improve those outcomes. In contrast to pregnancies in developed regions, our  
4  
5 276 analysis demonstrated a modest increase in birth weight was associated with bed rest in  
6  
7 277 Zimbabwe (100g). Concurrently, the risk of delivering a newborn <2500g was reduced by 22%.  
8  
9  
10 278 The association of positive outcomes with bed rest in undeveloped regions may be confounded  
11  
12 279 by hospitalization.  
13

14  
15 280

16  
17 281 To examine the potential confounding effect of multiple versus single gestation pregnancies,  
18  
19 282 additional sub-group analyses were conducted. Sub-group differences were non-significant and  
20  
21 283 within-group heterogeneity was increased. Overall, bed rest increased birth weight by 80g in  
22  
23 284 twin/triplet pregnancies compared to the no bed rest group. However, this modest improvement  
24  
25  
26 285 in birth weight was not associated with increased gestational age at birth in twin/triplet  
27  
28 286 pregnancies (36.1 weeks for bed rest and 36.5 weeks for no bed rest groups).  
29

30  
31 287

### 32 33 288 **Strengths and limitations**

34  
35 289 This study is the first of its kind to have sufficient power to assess the relationship between  
36  
37 290 prenatal bed rest and maternal/fetal health outcomes. In order to achieve sufficient statistical  
38  
39 291 power, all indications for bed rest were combined. This approach resulted in the inclusion of 14  
40  
41  
42 292 studies incorporating 2,608 pregnancies and 3,328 babies. We believe that this provides a  
43  
44 293 valuable and relevant assessment of bed rest as a non-specific clinical intervention that is widely  
45  
46 294 used in obstetric populations. As Zimbabwe has one of the highest rates of maternal and fetal  
47  
48 295 morbidity and mortality in the world, our findings from undeveloped regions may not be  
49  
50 296 generalizable to other developing regions.  
51

52  
53  
54 297  
55  
56  
57  
58  
59  
60

1  
2  
3 298 Between 71 and 95% of maternity health care professionals prescribe bed rest for high-risk  
4  
5 299 pregnancy complications<sup>1,8</sup>. However, our analyses demonstrated that instead of improving  
6  
7 300 outcomes, prescription of bed rest have no effects on maternal outcomes, and may be associated  
8  
9 301 with serious negative consequences for the newborn in developed regions. Based on the results  
10  
11 302 of our meta-analysis, in developed regions one additional baby will be born very premature for  
12  
13 303 every 5.9 women treated with bed rest and one additional baby will be born <1500 grams for  
14  
15 304 every 20 women treated with bed rest. Due to the negative effects of bed rest on baby, prenatal  
16  
17 305 bed rest in developed regions should be abandoned in standard clinical practice. In conjunction  
18  
19 306 with the overwhelming evidence supporting negative maternal health consequences of prenatal  
20  
21 307 bed rest, our results suggest there is no advantage for the newborns and the mothers, and that this  
22  
23 308 practice should be abandoned in developed regions. Alternatively, hospitalized bed rest in  
24  
25 309 Zimbabwe, the only undeveloped country represented in this review, has demonstrated health  
26  
27 310 benefits for the newborn including increased birth weight and decreased risk of being born  
28  
29 311 <2500g. As all women on bed rest in undeveloped regions were hospitalized and all women  
30  
31 312 randomized to no bed rest were allowed to return home, it is difficult to determine if the  
32  
33 313 improvement in health outcomes was due to bed rest per se, or hospitalization and better access  
34  
35 314 to food, clean water and medical staff.  
36  
37  
38  
39  
40  
41  
42  
43

#### 44 316 **Conclusion**

45  
46 317 Prenatal bed rest in developed regions should be abandoned in clinical practice and used only in  
47  
48 318 the context of further research. In undeveloped regions, bed rest appears to have a positive effect  
49  
50 319 on birth weight but may be confounded by the effects of hospitalization.  
51  
52  
53  
54 320

321 **References**

- 322 1. Goldenberg RL, Cliver SP, Bronstein J, Cutter GR, Andrews WW, Mennemeyer ST.  
323 Bed rest in pregnancy. *Obstet Gynecol.* 1994;84:131-6.
- 324 2. Sciscione AC. Maternal activity restriction and the prevention of preterm birth. *Am J*  
325 *Obstet Gynecol.* 2010;202:232 e1-5.
- 326 3. Durrance CP, Guldi M. Maternal Bed Rest and Infant Health. *Am J Health Econ.*  
327 2015;1:345-73.
- 328 4. Biggio JR, Jr. Bed rest in pregnancy: time to put the issue to rest. *Obstet Gynecol.*  
329 2013;121:1158-60.
- 330 5. Maloni JA. Lack of evidence for prescription of antepartum bed rest. *Expert Rev*  
331 *Obstet Gynecol.* 2011;6:385-93.
- 332 6. Maloni JA, Chance B, Zhang C, Cohen AW, Betts D, Gange SJ. Physical and  
333 psychosocial side effects of antepartum hospital bed rest. *Nurs Res.* 1993;42:197-  
334 203.
- 335 7. Jacobsen AF, Skjeldestad FE, Sandset PM. Ante- and postnatal risk factors of venous  
336 thrombosis: a hospital-based case-control study. *J Thromb Haemost.* 2008;6:905-12.
- 337 8. Fox NS, Gelber SE, Kalish RB, Chasen ST. The recommendation for bed rest in the  
338 setting of arrested preterm labor and premature rupture of membranes. *Am J Obstet*  
339 *Gynecol.* 2009;200:165 e1-6.
- 340 9. McCall CA, Grimes DA, Lyerly AD. "Therapeutic" bed rest in pregnancy: unethical  
341 and unsupported by data. *Obstet Gynecol.* 2013;121:1305-8.
- 342 10. Organization WH. WHO recommendations for prevention and treatment of pre-  
343 eclampsia and eclampsia. 2011.

- 1  
2  
3 344 11. Moher D, Liberati A, Tetzlaff J, Altman DGJAoim. Preferred reporting items for  
4  
5 345 systematic reviews and meta-analyses: the PRISMA statement. 2009;151:264-9.  
6  
7  
8 346 12. Julian P, Higgins SG, Green SJTCC. Cochrane handbook for systematic reviews of  
9  
10 347 interventions. 2011.  
11  
12 348 13. World Bank Country and Lending Groups. 2018;  
13  
14 <http://data.worldbank.org/about/country-classifications>, 2018.  
15 349  
16  
17 350 14. Jadad AR, Moore RA, Carroll D, et al. Assessing the quality of reports of randomized  
18  
19 351 clinical trials: is blinding necessary? *Control Clin Trials*. 1996;17:1-12.  
20  
21 352 15. Crowther CA, Verkuyl DA, Ashworth MF, Bannerman C, Ashurst HM. The effects of  
22  
23 353 hospitalization for bed rest on duration of gestation, fetal growth and neonatal  
24  
25 354 morbidity in triplet pregnancy. *Acta Genet Med Gemellol (Roma)*. 1991;40:63-8.  
26  
27 355 16. Crowther CA, Verkuyl DA, Neilson JP, Bannerman C, Ashurst HM. The effects of  
28  
29 356 hospitalization for rest on fetal growth, neonatal morbidity and length of gestation  
30  
31 357 in twin pregnancy. *Br J Obstet Gynaecol*. 1990;97:872-7.  
32  
33 358 17. Crowther CA, Neilson JP, Verkuyl DA, Bannerman C, Ashurst HM. Preterm labour in  
34  
35 359 twin pregnancies: can it be prevented by hospital admission? *Br J Obstet Gynaecol*.  
36  
37 360 1989;96:850-3.  
38  
39 361 18. Saunders MC, Dick JS, Brown IM, McPherson K, Chalmers I. The effects of hospital  
40  
41 362 admission for bed rest on the duration of twin pregnancy: a randomised trial.  
42  
43 363 *Lancet*. 1985;2:793-5.  
44  
45 364 19. Crowther C, Bouwmeester A, Ashurst HJBAIJoO, Gynaecology. Does admission to  
46  
47 365 hospital for bed rest prevent disease progression or improve fetal outcome in  
48  
49 366 pregnancy complicated by non - proteinuric hypertension? 1992;99:13-7.  
50  
51  
52  
53  
54  
55  
56  
57  
58  
59  
60

- 1  
2  
3 367 20. Dodd JM, Crowther CA. Hospitalisation for bed rest for women with a triplet  
4  
5 368 pregnancy: an abandoned randomised controlled trial and meta-analysis. *BMC*  
6  
7  
8 369 *Pregnancy Childbirth*. 2005;5:8.  
9  
10 370 21. Hartikainensorri AL, Jouppila P. Is Routine Hospitalization Needed in Antenatal Care  
11  
12 371 of Twin Pregnancy. *Journal of Perinatal Medicine*. 1984;12:31-4.  
13  
14  
15 372 22. Maclennan AH, Green RC, Oshea R, Brookes C, Morris D. Routine Hospital Admission  
16  
17 373 in Twin Pregnancy between 26 and 30 Weeks Gestation. *Lancet*. 1990;335:267-9.  
18  
19  
20 374 23. Mathews DD. A randomized controlled trial of bed rest and sedation or normal  
21  
22 375 activity and non-sedation in the management of non-albuminuric hypertension in  
23  
24 376 late pregnancy. *Br J Obstet Gynaecol*. 1977;84:108-14.  
25  
26  
27 377 24. Leung K, Sum T, Tse C, Law K, Chan MJHKMJ. Is in-patient management of diastolic  
28  
29 378 blood pressure between 90 and 100 mm Hg during pregnancy necessary?  
30  
31 379 1998;4:211-8.  
32  
33  
34 380 25. Hobel CJ, Ross MG, Bemis RL, et al. The West Los Angeles preterm birth prevention  
35  
36 381 project. I. Program impact on high-risk women. 1994;170:54-62.  
37  
38  
39 382 26. Elliott JP, Miller HS, Coleman S, et al. A randomized multicenter study to determine  
40  
41 383 the efficacy of activity restriction for preterm labor management in patients testing  
42  
43 384 negative for fetal fibronectin. *J Perinatol*. 2005;25:626-30.  
44  
45  
46 385 27. Laurin J, Persson PH. The effect of bedrest in hospital on fetal outcome in  
47  
48 386 pregnancies complicated by intra-uterine growth retardation. *Acta Obstet Gynecol*  
49  
50 387 *Scand*. 1987;66:407-11.  
51  
52  
53 388 28. Bigelow CA, Factor SH, Miller M, Weintraub A, Stone J. Pilot Randomized Controlled  
54  
55 389 Trial to Evaluate the Impact of Bed Rest on Maternal and Fetal Outcomes in Women  
56  
57  
58  
59  
60



1  
2  
3 390 with Preterm Premature Rupture of the Membranes. *Am J Perinatol.* 2016;33:356-  
4  
5 391 63.  
6  
7  
8 392 29. Goldenberg RL, Culhane JF, Iams JD, Romero R. Epidemiology and causes of preterm  
9  
10 393 birth. *Lancet.* 2008;371:75-84.  
11  
12  
13 394  
14  
15 395  
16  
17 396  
18  
19 397  
20  
21  
22 398  
23  
24 399  
25 400  
26 401  
27 402  
28 403  
29 404  
30  
31  
32 405  
33  
34 406  
35  
36 407  
37  
38 408  
39  
40 409  
41  
42 410  
43  
44 411  
45  
46 412  
47  
48 413  
49  
50 414  
51  
52 415  
53  
54  
55  
56  
57  
58  
59  
60

Confidential

1  
2  
3 **416 Legends**  
4

5  
6 417 Figure 1: Study flow diagram.  
7

8 418 Figure 2: Effect of Bed rest (experimental) vs. non-bed rest (control) on perinatal death.  
9

10 419 Bed rest did not significantly decrease perinatal death in undeveloped regions or  
11

12 420 developed regions. OR = Odds Ratio; 95% confidence interval = [95% CI].  
13  
14

15 421 Figure 3: Effect of Bed rest (experimental) vs. non-bed rest (control) on gestational age.  
16

17 422 Bed rest resulted in 0.77 weeks decreased in gestational age in developed regions. WMD =  
18

19 423 weighted mean difference; 95% confidence interval = [95% CI].  
20  
21

22 424 Figure 4: Effect of Bed rest (experimental) vs. non-bed rest (control) on very preterm birth.  
23

24 425 Bed rest increased the rate of very preterm birth in pregnancies in developed regions. OR =  
25

26 426 Odds Ratio; 95% confidence interval = [95% CI].  
27  
28

29 427 Figure 5: Effect of Bed rest (experimental) vs. non-bed rest (control) on birthweight. Bed  
30

31 428 rest resulted in 100g increased in birth weight in undeveloped regions. WMD = weighted  
32

33 429 mean difference; 95% confidence interval = [95% CI].  
34  
35  
36  
37  
38  
39  
40  
41  
42  
43  
44  
45  
46  
47  
48  
49  
50  
51  
52  
53  
54  
55  
56  
57  
58  
59  
60

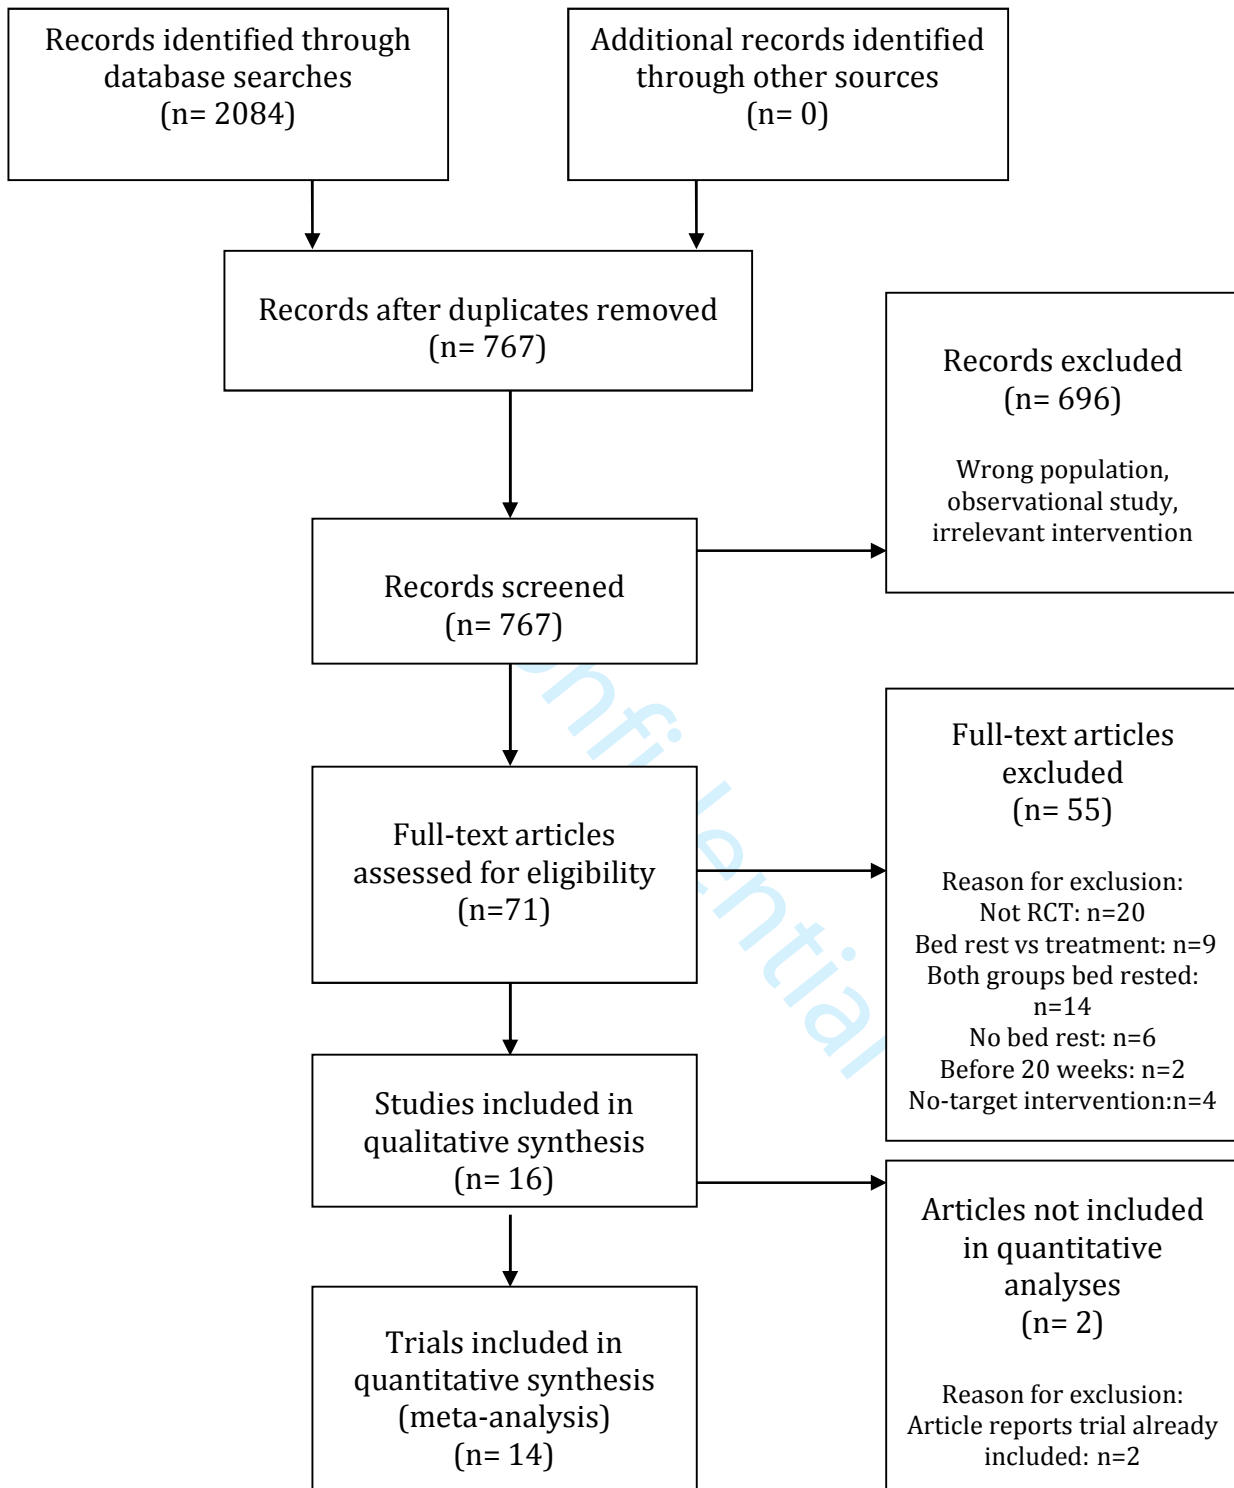

Figure 1. Study flow diagram.

1  
2  
3  
4  
5  
6  
7  
8  
9  
10  
11  
12  
13  
14  
15  
16  
17  
18  
19  
20  
21  
22  
23  
24  
25  
26  
27  
28  
29  
30  
31  
32  
33  
34  
35  
36  
37  
38  
39  
40  
41  
42  
43  
44  
45  
46  
47  
48  
49  
50  
51  
52  
53  
54  
55  
56  
57  
58  
59  
60

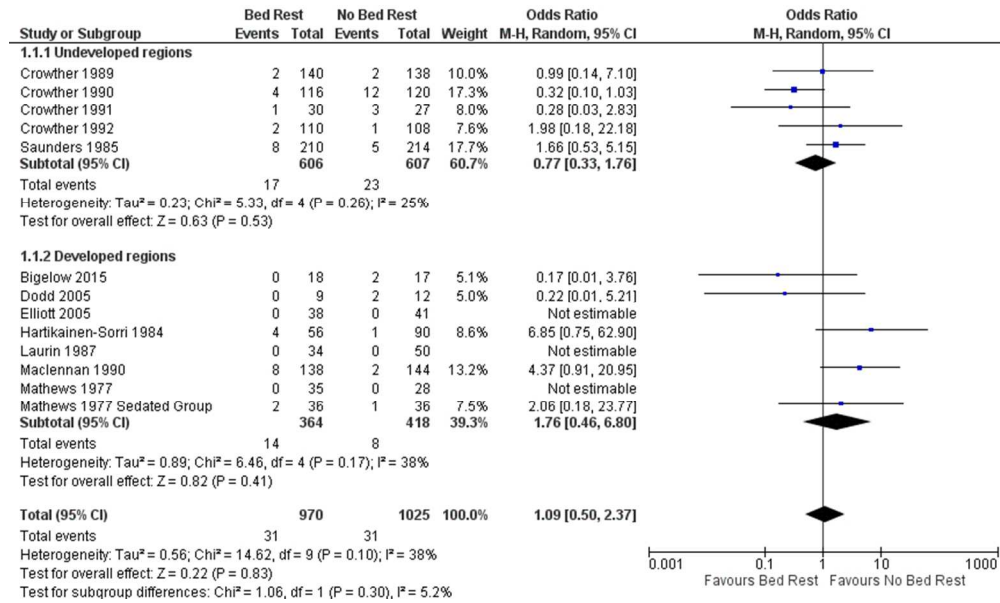

Figure 2: Effect of Bed rest (experimental) vs. non-bed rest (control) on perinatal death. Bed rest did not significantly decrease perinatal death in undeveloped regions or developed regions. OR = Odds Ratio; 95% confidence interval = [95% CI].

304x180mm (72 x 72 DPI)

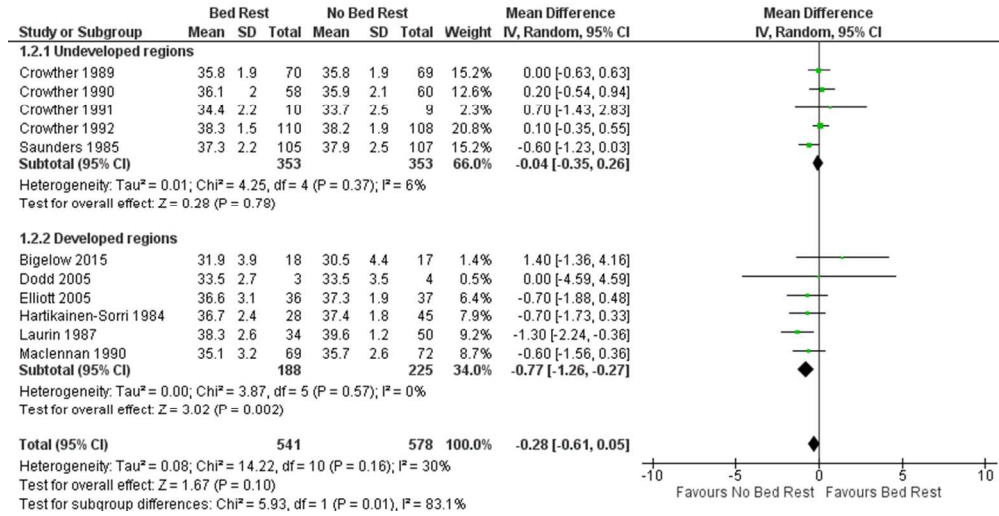

Effect of Bed rest (experimental) vs. non-bed rest (control) on gestational age. Bed rest resulted in 0.77 weeks decreased in gestational age in developed regions. WMD = weighted mean difference; 95% confidence interval = [95% CI].

300x152mm (72 x 72 DPI)

1  
2  
3  
4  
5  
6  
7  
8  
9  
10  
11  
12  
13  
14  
15  
16  
17  
18  
19  
20  
21  
22  
23  
24  
25  
26  
27  
28  
29  
30  
31  
32  
33  
34  
35  
36  
37  
38  
39  
40  
41  
42  
43  
44  
45  
46  
47  
48  
49  
50  
51  
52  
53  
54  
55  
56  
57  
58  
59  
60

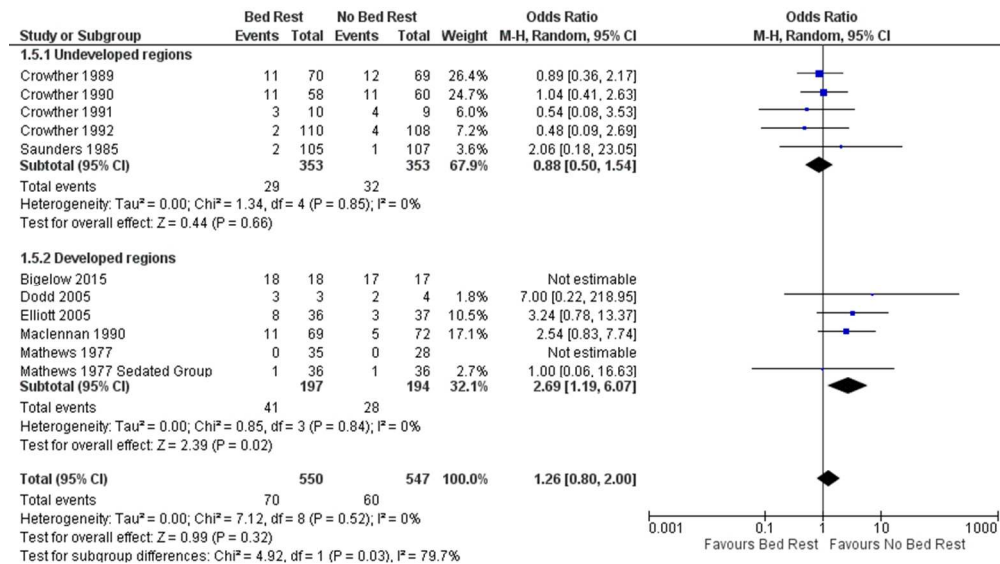

Figure 4: Effect of Bed rest (experimental) vs. non-bed rest (control) on very preterm birth. Bed rest increased the rate of very preterm birth in pregnancies in developed regions. OR = Odds Ratio; 95% confidence interval = [95% CI].

304x169mm (72 x 72 DPI)

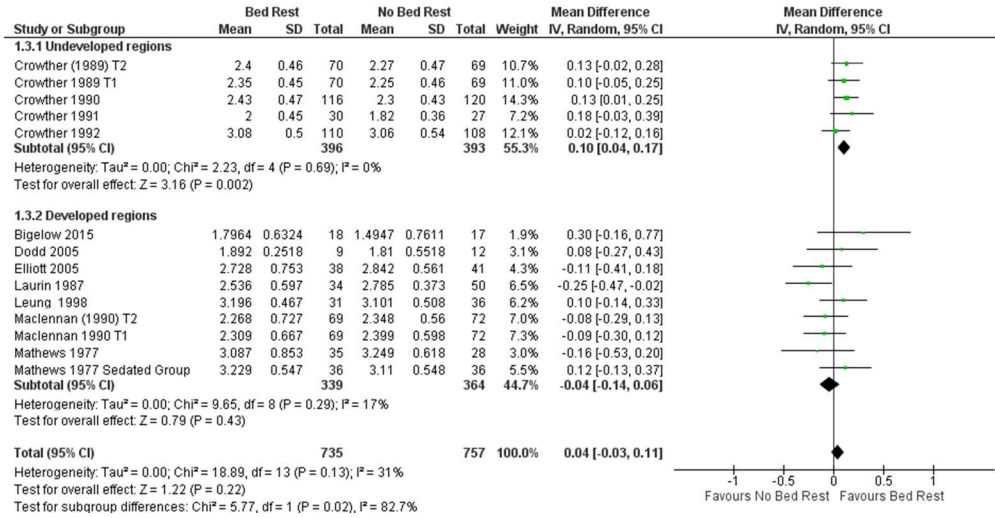

Figure 5: Effect of Bed rest (experimental) vs. non-bed rest (control) on birthweight. Bed rest resulted in 100g increased in birth weight in undeveloped regions. WMD = weighted mean difference; 95% confidence interval = [95% CI].

332x169mm (72 x 72 DPI)

**ONLINE SUPPLEMENT TABLE 1. Study Characteristics.**

| Author, Year, Country           | Sample Size, n                   | Age±SD, y              | Study Start BMI, kg/m <sup>2</sup> (or 28weeks #) | Indication for Bed Rest       | Bed Rest Intervention                                    |                                               | Complications                          |        |          |                |                                                                                                                                    |
|---------------------------------|----------------------------------|------------------------|---------------------------------------------------|-------------------------------|----------------------------------------------------------|-----------------------------------------------|----------------------------------------|--------|----------|----------------|------------------------------------------------------------------------------------------------------------------------------------|
|                                 |                                  |                        |                                                   |                               | Gestational age at Start of Bed Rest or study entry ± SD | Length of Bed Rest or length in study (weeks) | Maternal Hypertension or Pre-eclampsia | GDM    | PROM     | Preterm Labour | Misc.                                                                                                                              |
| Bigelow 2015, USA               | HBR: 18<br>NBR: 17               | 30.5±20.0<br>32.0±17.8 | NA<br>NA                                          | PROM                          | 29.2±5.7<br>28.9±7.6                                     | 2.7<br>1.6                                    |                                        |        | 18<br>17 |                | latency antibiotics -<br>=ampicillin/amoxicillin and<br>erythromycin for up to 7 days<br>and a 48 hr course of IM<br>betamethasone |
| Crowther 1989, Zimbabwe         | HBR: 70<br>NBR: 69               | 27.1±5.9<br>27.0±5.7   | 26.60<br>27.47                                    | Multiple Gestation            | 33.3±1.8<br>33.5±1.8                                     | 2.5<br>2.3                                    | 7<br>6                                 |        | 13<br>8  |                |                                                                                                                                    |
| Crowther 1990, Zimbabwe         | HBR: 58<br>NBR: 60               | 26.5±5.7<br>26.7±5.4   | 26.57<br>27.52                                    | Multiple Gestation            | 29.1±1.2<br>29.2±1.7                                     | 7.0<br>6.7                                    | 3<br>9                                 |        | 7<br>5   |                |                                                                                                                                    |
| Crowther 1986/91, Zimbabwe      | BR: 10<br>NBR: 9                 | 25.2±5.5<br>29.3±7.4   | 27.02<br>28.24                                    | Multiple Gestation            | 29.0±4.7<br>29.4±3.0                                     | 5.4<br>4.3                                    | 1<br>3                                 |        | 1<br>3   |                |                                                                                                                                    |
| Crowther 1992, Zimbabwe         | HBR: 110<br>NBR: 108             | 28.9±6.6<br>28.7±6.3   | 30.36<br>30.55                                    | Hypertension/<br>Preeclampsia | 35.3±2.6<br>34.6±3.0                                     | 3.0<br>3.6                                    | 15‡25*<br>18‡45*                       |        |          |                |                                                                                                                                    |
| Dodd 2005, Australia            | HBR: 3<br>NBR: 4                 | 33.2±0.8<br>36.2±13.2  | 21.57<br>22.65                                    | Multiple Gestation            | 23.4±1.7<br>22.0±1.8                                     | NA<br>NA                                      | 1<br>1                                 |        |          |                |                                                                                                                                    |
| Elliot 2005, USA                | AR: 36<br>NBR: 37                | 24.8±5.5<br>24.9±5.2   | NA<br>NA                                          | Preterm Labour                | 30.7±2.7<br>31.0±2.5                                     | 5.9<br>6.3                                    |                                        |        |          | 36<br>37       | Tocolysis with<br>MgSO4                                                                                                            |
| Hartikainen-Sorri 1984, Finland | HBR: 28<br>NBR: 45               | NA<br>NA               | NA<br>NA                                          | Multiple Gestation            | NA<br>NA                                                 | NA<br>NA                                      | unknown§<br>unknown§                   |        |          |                |                                                                                                                                    |
| Hobel 1994, USA                 | HBR: 432<br>NBR: 422<br>NBRP:412 | NA<br>NA<br>NA         | NA<br>NA<br>NA                                    | Preterm Labour                | NA<br>NA<br>NA                                           | NA<br>NA<br>NA                                |                                        |        |          | 34<br>41<br>30 |                                                                                                                                    |
| Laurin 1987, Sweden             | HBR: 34<br>NBR: 50               | 25.6±4.4<br>25.8±5.0   | NA<br>NA                                          | Suspected IUGR                | NA<br>NA                                                 | NA<br>NA                                      |                                        |        |          | 2<br>4         |                                                                                                                                    |
| Leung 1998, Hong Kong           | HAR: 44<br>NBR: 44               | 31.0±5.2<br>32.5±5.3   | 22.64<br>23.92                                    | Hypertension                  | 33.2±2.9<br>33.1±3.0                                     | 1.0<br>0.4                                    | 31<br>36                               |        |          |                |                                                                                                                                    |
| Maclennan 1990, Australia       | HBR: 69<br>NBR: 72               | 29.5±3.1<br>28.4±3.6   | 27.43<br>27.39                                    | Multiple Gestation            | 26.0±2.1<br>26.0±2.1                                     | 9.1<br>9.7                                    | 9<br>31                                | 3<br>3 | 13<br>9  |                |                                                                                                                                    |



|                            |                       |                      |               |                       |               |              |            |           |           |            |  |                                                               |
|----------------------------|-----------------------|----------------------|---------------|-----------------------|---------------|--------------|------------|-----------|-----------|------------|--|---------------------------------------------------------------|
| Mathews 1977/82,<br>UK     | BR S: 36<br>NBR S: 36 | NA<br>NA             | NA<br>NA      | Multiple<br>Gestation | >28<br>>28    | NA<br>NA     | 36<br>36   |           |           |            |  | Sedation with<br>phenobarbitone 15<br>mg three times a<br>day |
|                            | BR: 35<br>NBR: 28     | NA<br>NA             | NA<br>NA      |                       | >28<br>>28    | NA<br>NA     | 35<br>28   |           |           |            |  |                                                               |
| Saunders 1985,<br>Zimbabwe | HBR: 105<br>NBR: 107  | 26.6±6.7<br>27.3±6.0 | NA<br>NA      | Multiple<br>Gestation | 32.7<br>32†   | 4.6<br>0.5   | 4<br>5     |           |           |            |  |                                                               |
| <b>Totals:</b>             | <b>2,608</b>          | <b>27.9  </b>        | <b>27.6  </b> |                       | <b>31.5  </b> | <b>4.2  </b> | <b>386</b> | <b>10</b> | <b>94</b> | <b>184</b> |  |                                                               |

†were recruited before 32 weeks gestation; ‡chronic hypertension; \*severe hypertension; §both groups had similar numbers of complications including hypertension; ||weighted averages; HBR = hospitalized bed rest; NBR = no bed rest; BR = bed rest; AR = activity restriction; NBRP = no bed rest, participants treated with placebo ; NAR = no activity restriction; BR S = bed rest with sedation; NBR S = no bed rest with sedation; PROM = premature rupture of membranes; GDM = gestational diabetes mellitus; IM = intra-muscular; SD = standard deviation; BMI = body mass index ( kg/m<sup>2</sup>).

1  
2  
3  
4  
5  
6  
7  
8  
9  
10  
11  
12  
13  
14  
15  
16  
17  
18  
19  
20  
21  
22  
23  
24  
25  
26  
27  
28  
29  
30  
31  
32  
33  
34  
35  
36  
37  
38  
39  
40  
41  
42  
43  
44  
45  
46  
47

ONLINE SUPPLEMENT TABLE 2. GRADE table for study quality evaluation.

| Certainty assessment                                                                                      |                   |              |               |              |                      |                      | № of patients |                | Effect                        |                                                     | Certainty    | Importance |
|-----------------------------------------------------------------------------------------------------------|-------------------|--------------|---------------|--------------|----------------------|----------------------|---------------|----------------|-------------------------------|-----------------------------------------------------|--------------|------------|
| № of studies                                                                                              | Study design      | Risk of bias | Inconsistency | Indirectness | Imprecision          | Other considerations | Bed rest      | control        | Relative (95% CI)             | Absolute (95% CI)                                   |              |            |
| Association between bed rest (intervention) and perinatal death                                           |                   |              |               |              |                      |                      |               |                |                               |                                                     |              |            |
| 12                                                                                                        | randomised trials | not serious  | not serious   | not serious  | serious <sup>a</sup> | none                 | 31/970 (3.2%) | 31/1025 (3.0%) | <b>OR 1.09</b> (0.50 to 2.37) | <b>3 more per 1,000</b> (from 15 fewer to 39 more)  | ⊕⊕⊕ MODERATE | CRITICAL   |
| Subgroup analysis: Association between bed rest (intervention) and perinatal death in undeveloped regions |                   |              |               |              |                      |                      |               |                |                               |                                                     |              |            |
| 5                                                                                                         | randomised trials | not serious  | not serious   | not serious  | serious <sup>a</sup> | none                 | 17/606 (2.8%) | 23/607 (3.8%)  | <b>OR 0.77</b> (0.33 to 1.76) | <b>8 fewer per 1,000</b> (from 25 fewer to 27 more) | ⊕⊕⊕ MODERATE | CRITICAL   |
| Subgroup analysis: Association between bed rest (intervention) and perinatal death in developed regions   |                   |              |               |              |                      |                      |               |                |                               |                                                     |              |            |

| Certainty assessment                                                                                      |                   |                      |               |              |                      |                      | № of patients |              | Effect                        |                                                      | Certainty    | Importance |
|-----------------------------------------------------------------------------------------------------------|-------------------|----------------------|---------------|--------------|----------------------|----------------------|---------------|--------------|-------------------------------|------------------------------------------------------|--------------|------------|
| № of studies                                                                                              | Study design      | Risk of bias         | Inconsistency | Indirectness | Imprecision          | Other considerations | Bed rest      | control      | Relative (95% CI)             | Absolute (95% CI)                                    |              |            |
| 7                                                                                                         | randomised trials | serious <sup>b</sup> | not serious   | not serious  | serious <sup>c</sup> | none                 | 14/364 (3.8%) | 8/418 (1.9%) | <b>OR 1.76</b> (0.46 to 6.80) | <b>14 more per 1,000</b> (from 10 fewer to 98 more)  | ⊕⊕<br>LOW    | CRITICAL   |
| Association between bed rest (intervention) and gestational age                                           |                   |                      |               |              |                      |                      |               |              |                               |                                                      |              |            |
| 11                                                                                                        | randomised trials | not serious          | not serious   | not serious  | not serious          | none                 | 541           | 578          | -                             | <b>MD 0.28 wks lower</b> (0.61 lower to 0.05 higher) | ⊕⊕⊕⊕<br>HIGH | CRITICAL   |
| Subgroup analysis: Association between bed rest (intervention) and gestational age in undeveloped regions |                   |                      |               |              |                      |                      |               |              |                               |                                                      |              |            |
| 5                                                                                                         | randomised trials | not serious          | not serious   | not serious  | not serious          | none                 | 353           | 353          | -                             | <b>MD 0.04 wks lower</b> (0.35 lower to 0.26 higher) | ⊕⊕⊕⊕<br>HIGH | CRITICAL   |
| Subgroup analysis: Association between bed rest (intervention) and gestational age in developed regions   |                   |                      |               |              |                      |                      |               |              |                               |                                                      |              |            |

1  
2  
3  
4  
5  
6  
7  
8  
9  
10  
11  
12  
13  
14  
15  
16  
17  
18  
19  
20  
21  
22  
23  
24  
25  
26  
27  
28  
29  
30  
31  
32  
33  
34  
35  
36  
37  
38  
39  
40  
41  
42  
43  
44  
45  
46  
47

| Certainty assessment                                                                                   |                   |                      |               |              |             |                      | № of patients |         | Effect            |                                               | Certainty    | Importance |
|--------------------------------------------------------------------------------------------------------|-------------------|----------------------|---------------|--------------|-------------|----------------------|---------------|---------|-------------------|-----------------------------------------------|--------------|------------|
| № of studies                                                                                           | Study design      | Risk of bias         | Inconsistency | Indirectness | Imprecision | Other considerations | Bed rest      | control | Relative (95% CI) | Absolute (95% CI)                             |              |            |
| 6                                                                                                      | randomised trials | serious <sup>d</sup> | not serious   | not serious  | not serious | none                 | 188           | 225     | -                 | MD 0.77 wks lower (1.26 lower to 0.27 lower)  | ⊕⊕⊕ MODERATE | CRITICAL   |
| Association between bed rest (intervention) and birth weight                                           |                   |                      |               |              |             |                      |               |         |                   |                                               |              |            |
| 11                                                                                                     | randomised trials | not serious          | not serious   | not serious  | not serious | none                 | 735           | 757     | -                 | MD 0.04 kg higher (0.03 lower to 0.11 higher) | ⊕⊕⊕⊕ HIGH    | CRITICAL   |
| Subgroup analysis: Association between bed rest (intervention) and birth weight in undeveloped regions |                   |                      |               |              |             |                      |               |         |                   |                                               |              |            |
| 4                                                                                                      | randomised trials | not serious          | not serious   | not serious  | not serious | none                 | 396           | 393     | -                 | MD 0.1 kg higher (0.04 higher to 0.17 higher) | ⊕⊕⊕⊕ HIGH    | CRITICAL   |

| Certainty assessment                                                                                  |                   |                      |                      |              |                      |                      | № of patients    |                  | Effect                        |                                                        | Certainty       | Importance |
|-------------------------------------------------------------------------------------------------------|-------------------|----------------------|----------------------|--------------|----------------------|----------------------|------------------|------------------|-------------------------------|--------------------------------------------------------|-----------------|------------|
| № of studies                                                                                          | Study design      | Risk of bias         | Inconsistency        | Indirectness | Imprecision          | Other considerations | Bed rest         | control          | Relative (95% CI)             | Absolute (95% CI)                                      |                 |            |
| Subgroup analysis: Association between bed rest (intervention) and birth weight in developed regions  |                   |                      |                      |              |                      |                      |                  |                  |                               |                                                        |                 |            |
| 7                                                                                                     | randomised trials | serious <sup>d</sup> | not serious          | not serious  | not serious          | none                 | 339              | 364              | -                             | MD <b>0.04 kg lower</b> (0.14 lower to 0.06 higher)    | ⊕⊕⊕<br>MODERATE | CRITICAL   |
| Association between bed rest (intervention) and prematurity                                           |                   |                      |                      |              |                      |                      |                  |                  |                               |                                                        |                 |            |
| 13                                                                                                    | randomised trials | serious <sup>e</sup> | not serious          | not serious  | serious <sup>a</sup> | none                 | 265/1045 (25.4%) | 306/1466 (20.9%) | OR <b>1.00</b> (0.78 to 1.30) | <b>0 fewer per 1,000</b> (from 38 fewer to 47 more)    | ⊕⊕<br>LOW       | CRITICAL   |
| Subgroup analysis: Association between bed rest (intervention) and prematurity in undeveloped regions |                   |                      |                      |              |                      |                      |                  |                  |                               |                                                        |                 |            |
| 5                                                                                                     | randomised trials | not serious          | serious <sup>f</sup> | not serious  | serious <sup>a</sup> | none                 | 140/353 (39.7%)  | 148/353 (41.9%)  | OR <b>0.82</b> (0.44 to 1.50) | <b>47 fewer per 1,000</b> (from 101 more to 178 fewer) | ⊕⊕<br>LOW       | CRITICAL   |

1  
2  
3  
4  
5  
6  
7  
8  
9  
10  
11  
12  
13  
14  
15  
16  
17  
18  
19  
20  
21  
22  
23  
24  
25  
26  
27  
28  
29  
30  
31  
32  
33  
34  
35  
36  
37  
38  
39  
40  
41  
42  
43  
44  
45  
46  
47

| Certainty assessment                                                                                           |                   |                      |               |              |                      |                      | № of patients   |                  | Effect                        |                                                      | Certainty       | Importance |
|----------------------------------------------------------------------------------------------------------------|-------------------|----------------------|---------------|--------------|----------------------|----------------------|-----------------|------------------|-------------------------------|------------------------------------------------------|-----------------|------------|
| № of studies                                                                                                   | Study design      | Risk of bias         | Inconsistency | Indirectness | Imprecision          | Other considerations | Bed rest        | control          | Relative (95% CI)             | Absolute (95% CI)                                    |                 |            |
| Subgroup analysis: Association between bed rest (intervention) and prematurity in developed regions            |                   |                      |               |              |                      |                      |                 |                  |                               |                                                      |                 |            |
| 8                                                                                                              | randomised trials | serious <sup>e</sup> | not serious   | not serious  | serious <sup>a</sup> | none                 | 125/692 (18.1%) | 158/1113 (14.2%) | <b>OR 1.11</b> (0.81 to 1.50) | <b>13 more per 1,000</b> (from 24 fewer to 57 more)  | ⊕⊕<br>LOW       | CRITICAL   |
| Association between bed rest (intervention) and very premature birth                                           |                   |                      |               |              |                      |                      |                 |                  |                               |                                                      |                 |            |
| 10                                                                                                             | randomised trials | not serious          | not serious   | not serious  | serious <sup>c</sup> | none                 | 70/550 (12.7%)  | 60/547 (11.0%)   | <b>OR 1.26</b> (0.80 to 2.00) | <b>25 more per 1,000</b> (from 20 fewer to 88 more)  | ⊕⊕⊕<br>MODERATE | CRITICAL   |
| Subgroup analysis: Association between bed rest (intervention) and very premature birth in undeveloped regions |                   |                      |               |              |                      |                      |                 |                  |                               |                                                      |                 |            |
| 5                                                                                                              | randomised trials | not serious          | not serious   | not serious  | serious <sup>a</sup> | none                 | 29/353 (8.2%)   | 32/353 (9.1%)    | <b>OR 0.88</b> (0.50 to 1.54) | <b>10 fewer per 1,000</b> (from 42 more to 43 fewer) | ⊕⊕⊕<br>MODERATE | CRITICAL   |

| Certainty assessment                                                                                          |                   |                      |               |              |                      |                      | № of patients   |                 | Effect                        |                                                      | Certainty    | Importance |
|---------------------------------------------------------------------------------------------------------------|-------------------|----------------------|---------------|--------------|----------------------|----------------------|-----------------|-----------------|-------------------------------|------------------------------------------------------|--------------|------------|
| № of studies                                                                                                  | Study design      | Risk of bias         | Inconsistency | Indirectness | Imprecision          | Other considerations | Bed rest        | control         | Relative (95% CI)             | Absolute (95% CI)                                    |              |            |
| Subgroup analysis: Association between bed rest (intervention) and very premature birth in developed regions  |                   |                      |               |              |                      |                      |                 |                 |                               |                                                      |              |            |
| 5                                                                                                             | randomised trials | serious <sup>g</sup> | not serious   | not serious  | not serious          | none                 | 41/197 (20.8%)  | 28/194 (14.4%)  | <b>OR 2.69</b> (1.19 to 6.07) | <b>168 more per 1,000</b> (from 23 more to 362 more) | ⊕⊕⊕ MODERATE | CRITICAL   |
| Association between bed rest (intervention) and birth weight <2500g                                           |                   |                      |               |              |                      |                      |                 |                 |                               |                                                      |              |            |
| 10                                                                                                            | randomised trials | not serious          | not serious   | not serious  | serious <sup>a</sup> | none                 | 384/899 (42.7%) | 431/938 (45.9%) | <b>OR 0.84</b> (0.69 to 1.03) | <b>43 fewer per 1,000</b> (from 7 more to 90 fewer)  | ⊕⊕⊕ MODERATE | CRITICAL   |
| Subgroup analysis: Association between bed rest (intervention) and birth weight <2500g in undeveloped regions |                   |                      |               |              |                      |                      |                 |                 |                               |                                                      |              |            |

1  
2  
3  
4  
5  
6  
7  
8  
9  
10  
11  
12  
13  
14  
15  
16  
17  
18  
19  
20  
21  
22  
23  
24  
25  
26  
27  
28  
29  
30  
31  
32  
33  
34  
35  
36  
37  
38  
39  
40  
41  
42  
43  
44  
45  
46  
47

| Certainty assessment                                                                                          |                   |                      |               |              |                      |                      | № of patients   |                 | Effect                           |                                                          | Certainty    | Importance |
|---------------------------------------------------------------------------------------------------------------|-------------------|----------------------|---------------|--------------|----------------------|----------------------|-----------------|-----------------|----------------------------------|----------------------------------------------------------|--------------|------------|
| № of studies                                                                                                  | Study design      | Risk of bias         | Inconsistency | Indirectness | Imprecision          | Other considerations | Bed rest        | control         | Relative (95% CI)                | Absolute (95% CI)                                        |              |            |
| 5                                                                                                             | randomised trials | not serious          | not serious   | not serious  | not serious          | none                 | 265/606 (43.7%) | 298/607 (49.1%) | <b>OR 0.78</b><br>(0.61 to 1.00) | <b>62 fewer per 1,000</b><br>(from 0 fewer to 121 fewer) | ⊕⊕⊕⊕<br>HIGH | CRITICAL   |
| Subgroup analysis: Association between bed rest (intervention) and birth weight <2500g in developed regions   |                   |                      |               |              |                      |                      |                 |                 |                                  |                                                          |              |            |
| 5                                                                                                             | randomised trials | serious <sup>g</sup> | not serious   | not serious  | serious <sup>a</sup> | none                 | 119/293 (40.6%) | 133/331 (40.2%) | <b>OR 1.01</b><br>(0.69 to 1.49) | <b>2 more per 1,000</b><br>(from 85 fewer to 98 more)    | ⊕⊕<br>LOW    | CRITICAL   |
| Association between bed rest (intervention) and birth weight <1500g                                           |                   |                      |               |              |                      |                      |                 |                 |                                  |                                                          |              |            |
| 8                                                                                                             | randomised trials | serious <sup>g</sup> | not serious   | not serious  | serious <sup>c</sup> | none                 | 41/740 (5.5%)   | 32/786 (4.1%)   | <b>OR 1.29</b><br>(0.69 to 2.40) | <b>11 more per 1,000</b><br>(from 12 fewer to 52 more)   | ⊕⊕<br>LOW    | CRITICAL   |
| Subgroup analysis: Association between bed rest (intervention) and birth weight <1500g in undeveloped regions |                   |                      |               |              |                      |                      |                 |                 |                                  |                                                          |              |            |



| Certainty assessment                                                                                                |                   |                      |               |              |                      |                      | № of patients   |                 | Effect                        |                                                      | Certainty    | Importance |
|---------------------------------------------------------------------------------------------------------------------|-------------------|----------------------|---------------|--------------|----------------------|----------------------|-----------------|-----------------|-------------------------------|------------------------------------------------------|--------------|------------|
| № of studies                                                                                                        | Study design      | Risk of bias         | Inconsistency | Indirectness | Imprecision          | Other considerations | Bed rest        | control         | Relative (95% CI)             | Absolute (95% CI)                                    |              |            |
| 4                                                                                                                   | randomised trials | not serious          | not serious   | not serious  | serious <sup>c</sup> | none                 | 13/496 (2.6%)   | 15/499 (3.0%)   | <b>OR 0.76</b> (0.34 to 1.73) | <b>7 fewer per 1,000</b> (from 20 fewer to 21 more)  | ⊕⊕⊕ MODERATE | CRITICAL   |
| Subgroup analysis: Association between bed rest (intervention) and birth weight <1500g in developed regions         |                   |                      |               |              |                      |                      |                 |                 |                               |                                                      |              |            |
| 4                                                                                                                   | randomised trials | serious <sup>g</sup> | not serious   | not serious  | not serious          | none                 | 28/244 (11.5%)  | 17/287 (5.9%)   | <b>OR 1.93</b> (1.00 to 3.70) | <b>49 more per 1,000</b> (from 0 fewer to 130 more)  | ⊕⊕⊕ MODERATE | CRITICAL   |
| Association between bed rest (intervention) and small for gestational age                                           |                   |                      |               |              |                      |                      |                 |                 |                               |                                                      |              |            |
| 6                                                                                                                   | randomised trials | not serious          | not serious   | not serious  | serious <sup>a</sup> | none                 | 129/498 (25.9%) | 143/493 (29.0%) | <b>OR 0.84</b> (0.62 to 1.12) | <b>35 fewer per 1,000</b> (from 24 more to 88 fewer) | ⊕⊕⊕ MODERATE | CRITICAL   |
| Subgroup analysis: Association between bed rest (intervention) and small for gestational age in undeveloped regions |                   |                      |               |              |                      |                      |                 |                 |                               |                                                      |              |            |

1  
2  
3  
4  
5  
6  
7  
8  
9  
10  
11  
12  
13  
14  
15  
16  
17  
18  
19  
20  
21  
22  
23  
24  
25  
26  
27  
28  
29  
30  
31  
32  
33  
34  
35  
36  
37  
38  
39  
40  
41  
42  
43  
44  
45  
46  
47

| Certainty assessment                                                                                              |                   |              |               |              |                      |                      | № of patients   |                 | Effect                           |                                                          | Certainty       | Importance |
|-------------------------------------------------------------------------------------------------------------------|-------------------|--------------|---------------|--------------|----------------------|----------------------|-----------------|-----------------|----------------------------------|----------------------------------------------------------|-----------------|------------|
| № of studies                                                                                                      | Study design      | Risk of bias | Inconsistency | Indirectness | Imprecision          | Other considerations | Bed rest        | control         | Relative (95% CI)                | Absolute (95% CI)                                        |                 |            |
| 4                                                                                                                 | randomised trials | not serious  | not serious   | not serious  | serious <sup>a</sup> | none                 | 115/396 (29.0%) | 131/393 (33.3%) | <b>OR 0.81</b><br>(0.59 to 1.10) | <b>45 fewer per 1,000</b><br>(from 22 more to 106 fewer) | ⊕⊕⊕<br>MODERATE | CRITICAL   |
| Subgroup analysis: Association between bed rest (intervention) and small for gestational age in developed regions |                   |              |               |              |                      |                      |                 |                 |                                  |                                                          |                 |            |
| 2                                                                                                                 | randomised trials | not serious  | not serious   | not serious  | serious <sup>c</sup> | none                 | 14/102 (13.7%)  | 12/100 (12.0%)  | <b>OR 1.10</b><br>(0.43 to 2.81) | <b>10 more per 1,000</b><br>(from 65 fewer to 157 more)  | ⊕⊕⊕<br>MODERATE | CRITICAL   |
| Association between bed rest (intervention) and admission to NICU                                                 |                   |              |               |              |                      |                      |                 |                 |                                  |                                                          |                 |            |
| 8                                                                                                                 | randomised trials | not serious  | not serious   | not serious  | serious <sup>a</sup> | none                 | 184/621 (29.6%) | 197/631 (31.2%) | <b>OR 0.88</b><br>(0.67 to 1.16) | <b>27 fewer per 1,000</b><br>(from 33 more to 79 fewer)  | ⊕⊕⊕<br>MODERATE | CRITICAL   |

| Certainty assessment                                                                                        |                   |                      |               |              |                      |                      | № of patients   |                 | Effect                           |                                                          | Certainty       | Importance |
|-------------------------------------------------------------------------------------------------------------|-------------------|----------------------|---------------|--------------|----------------------|----------------------|-----------------|-----------------|----------------------------------|----------------------------------------------------------|-----------------|------------|
| № of studies                                                                                                | Study design      | Risk of bias         | Inconsistency | Indirectness | Imprecision          | Other considerations | Bed rest        | control         | Relative (95% CI)                | Absolute (95% CI)                                        |                 |            |
| Subgroup analysis: Association between bed rest (intervention) and admission to NICU in undeveloped regions |                   |                      |               |              |                      |                      |                 |                 |                                  |                                                          |                 |            |
| 4                                                                                                           | randomised trials | not serious          | not serious   | not serious  | serious <sup>a</sup> | none                 | 128/396 (32.3%) | 143/393 (36.4%) | <b>OR 0.79</b><br>(0.57 to 1.10) | <b>53 fewer per 1,000</b><br>(from 22 more to 118 fewer) | ⊕⊕⊕<br>MODERATE | CRITICAL   |
| Subgroup analysis: Association between bed rest (intervention) and admission to NICU in developed regions   |                   |                      |               |              |                      |                      |                 |                 |                                  |                                                          |                 |            |
| 4                                                                                                           | randomised trials | serious <sup>g</sup> | not serious   | not serious  | serious <sup>a</sup> | none                 | 56/225 (24.9%)  | 54/238 (22.7%)  | <b>OR 1.12</b><br>(0.69 to 1.84) | <b>20 more per 1,000</b><br>(from 58 fewer to 124 more)  | ⊕⊕<br>LOW       | CRITICAL   |
| Association between bed rest (intervention) and birth weight in multiple gestation pregnancies              |                   |                      |               |              |                      |                      |                 |                 |                                  |                                                          |                 |            |

1  
2  
3  
4  
5  
6  
7  
8  
9  
10  
11  
12  
13  
14  
15  
16  
17  
18  
19  
20  
21  
22  
23  
24  
25  
26  
27  
28  
29  
30  
31  
32  
33  
34  
35  
36  
37  
38  
39  
40  
41  
42  
43  
44  
45  
46  
47

| Certainty assessment                                                                                                                     |                   |                      |               |              |             |                      | № of patients |         | Effect            |                                                       | Certainty    | Importance |
|------------------------------------------------------------------------------------------------------------------------------------------|-------------------|----------------------|---------------|--------------|-------------|----------------------|---------------|---------|-------------------|-------------------------------------------------------|--------------|------------|
| № of studies                                                                                                                             | Study design      | Risk of bias         | Inconsistency | Indirectness | Imprecision | Other considerations | Bed rest      | control | Relative (95% CI) | Absolute (95% CI)                                     |              |            |
| 5                                                                                                                                        | randomised trials | serious <sup>g</sup> | not serious   | not serious  | not serious | none                 | 433           | 441     | -                 | MD <b>0.08 kg higher</b> (0.01 higher to 0.15 higher) | ⊕⊕⊕ MODERATE | CRITICAL   |
| Subgroup analysis: Association between bed rest (intervention) and birth weight in multiple gestation pregnancies in undeveloped regions |                   |                      |               |              |             |                      |               |         |                   |                                                       |              |            |
| 3                                                                                                                                        | randomised trials | not serious          | not serious   | not serious  | not serious | none                 | 286           | 285     | -                 | MD <b>0.13 kg higher</b> (0.06 higher to 0.2 higher)  | ⊕⊕⊕⊕ HIGH    | CRITICAL   |
| Subgroup analysis: Association between bed rest (intervention) and birth weight in multiple gestation pregnancies in developed regions   |                   |                      |               |              |             |                      |               |         |                   |                                                       |              |            |
| 2                                                                                                                                        | randomised trials | serious <sup>g</sup> | not serious   | not serious  | not serious | none                 | 147           | 156     | -                 | MD <b>0.06 kg lower</b> (0.02 lower to 0.08 higher)   | ⊕⊕⊕ MODERATE | CRITICAL   |
| Association between bed rest (intervention) and C-section                                                                                |                   |                      |               |              |             |                      |               |         |                   |                                                       |              |            |

| Certainty assessment                                                                                |                   |                      |               |              |                      |                      | № of patients   |                 | Effect                        |                                                       | Certainty       | Importance |
|-----------------------------------------------------------------------------------------------------|-------------------|----------------------|---------------|--------------|----------------------|----------------------|-----------------|-----------------|-------------------------------|-------------------------------------------------------|-----------------|------------|
| № of studies                                                                                        | Study design      | Risk of bias         | Inconsistency | Indirectness | Imprecision          | Other considerations | Bed rest        | control         | Relative (95% CI)             | Absolute (95% CI)                                     |                 |            |
| 10                                                                                                  | randomised trials | serious <sup>d</sup> | not serious   | not serious  | serious <sup>a</sup> | none                 | 109/474 (23.0%) | 109/489 (22.3%) | <b>OR 1.04</b> (0.66 to 1.63) | <b>7 more per 1,000</b> (from 64 fewer to 96 more)    | ⊕⊕<br>LOW       | CRITICAL   |
| Subgroup analysis: Association between bed rest (intervention) and C-section in undeveloped regions |                   |                      |               |              |                      |                      |                 |                 |                               |                                                       |                 |            |
| 4                                                                                                   | randomised trials | not serious          | not serious   | not serious  | serious <sup>a</sup> | none                 | 38/248 (15.3%)  | 38/246 (15.4%)  | <b>OR 0.92</b> (0.44 to 1.93) | <b>11 fewer per 1,000</b> (from 80 fewer to 106 more) | ⊕⊕⊕<br>MODERATE | CRITICAL   |
| Subgroup analysis: Association between bed rest (intervention) and C-section in developed regions   |                   |                      |               |              |                      |                      |                 |                 |                               |                                                       |                 |            |
| 6                                                                                                   | randomised trials | serious <sup>d</sup> | not serious   | not serious  | serious <sup>a</sup> | none                 | 71/226 (31.4%)  | 71/243 (29.2%)  | <b>OR 1.11</b> (0.58 to 2.11) | <b>22 more per 1,000</b> (from 99 fewer to 173 more)  | ⊕⊕<br>LOW       | CRITICAL   |
| Association between bed rest (intervention) and pregnancy induced hypertension                      |                   |                      |               |              |                      |                      |                 |                 |                               |                                                       |                 |            |

1  
2  
3  
4  
5  
6  
7  
8  
9  
10  
11  
12  
13  
14  
15  
16  
17  
18  
19  
20  
21  
22  
23  
24  
25  
26  
27  
28  
29  
30  
31  
32  
33  
34  
35  
36  
37  
38  
39  
40  
41  
42  
43  
44  
45  
46  
47

| Certainty assessment                                                                                                     |                   |              |                      |              |                      |                      | № of patients  |                | Effect                           |                                                           | Certainty       | Importance |
|--------------------------------------------------------------------------------------------------------------------------|-------------------|--------------|----------------------|--------------|----------------------|----------------------|----------------|----------------|----------------------------------|-----------------------------------------------------------|-----------------|------------|
| № of studies                                                                                                             | Study design      | Risk of bias | Inconsistency        | Indirectness | Imprecision          | Other considerations | Bed rest       | control        | Relative (95% CI)                | Absolute (95% CI)                                         |                 |            |
| 6                                                                                                                        | randomised trials | not serious  | serious <sup>f</sup> | not serious  | serious <sup>c</sup> | none                 | 36/281 (12.8%) | 56/278 (20.1%) | <b>OR 0.74</b><br>(0.28 to 1.96) | <b>44 fewer per 1,000</b><br>(from 129 more to 135 fewer) | ⊕⊕<br>LOW       | CRITICAL   |
| Subgroup analysis: Association between bed rest (intervention) and pregnancy induced hypertension in undeveloped regions |                   |              |                      |              |                      |                      |                |                |                                  |                                                           |                 |            |
| 3                                                                                                                        | randomised trials | not serious  | not serious          | not serious  | serious <sup>a</sup> | none                 | 11/138 (8.0%)  | 18/138 (13.0%) | <b>OR 0.55</b><br>(0.19 to 1.55) | <b>54 fewer per 1,000</b><br>(from 58 more to 103 fewer)  | ⊕⊕⊕<br>MODERATE | CRITICAL   |
| Subgroup analysis: Association between bed rest (intervention) and pregnancy induced hypertension in developed regions   |                   |              |                      |              |                      |                      |                |                |                                  |                                                           |                 |            |

| Certainty assessment                                                         |                   |              |                      |              |                          |                      | № of patients  |                | Effect                           |                                                          | Certainty       | Importance |
|------------------------------------------------------------------------------|-------------------|--------------|----------------------|--------------|--------------------------|----------------------|----------------|----------------|----------------------------------|----------------------------------------------------------|-----------------|------------|
| № of studies                                                                 | Study design      | Risk of bias | Inconsistency        | Indirectness | Imprecision              | Other considerations | Bed rest       | control        | Relative (95% CI)                | Absolute (95% CI)                                        |                 |            |
| 3                                                                            | randomised trials | not serious  | serious <sup>f</sup> | not serious  | serious <sup>c</sup>     | none                 | 25/143 (17.5%) | 38/140 (27.1%) | <b>OR 1.16</b><br>(0.20 to 6.64) | <b>30 more per 1,000</b><br>(from 202 fewer to 441 more) | ⊕⊕<br>LOW       | CRITICAL   |
| Association between bed rest (intervention) and pre-eclampsia                |                   |              |                      |              |                          |                      |                |                |                                  |                                                          |                 |            |
| 1                                                                            | randomised trials | not serious  | serious <sup>h</sup> | not serious  | not serious <sup>i</sup> | none                 | 4/105 (3.8%)   | 7/107 (6.5%)   | <b>OR 0.57</b><br>(0.16 to 1.99) | <b>27 fewer per 1,000</b><br>(from 54 fewer to 57 more)  | ⊕⊕⊕<br>MODERATE | CRITICAL   |
| Association between bed rest (intervention) and preterm rupture of membranes |                   |              |                      |              |                          |                      |                |                |                                  |                                                          |                 |            |
| 4                                                                            | randomised trials | not serious  | not serious          | not serious  | serious <sup>c</sup>     | none                 | 34/219 (15.5%) | 25/219 (11.4%) | <b>OR 1.46</b><br>(0.83 to 2.57) | <b>44 more per 1,000</b><br>(from 18 fewer to 135 more)  | ⊕⊕⊕<br>MODERATE | CRITICAL   |

1  
2  
3  
4  
5  
6  
7  
8  
9  
10  
11  
12  
13  
14  
15  
16  
17  
18  
19  
20  
21  
22  
23  
24  
25  
26  
27  
28  
29  
30  
31  
32  
33  
34  
35  
36  
37  
38  
39  
40  
41  
42  
43  
44  
45  
46  
47

| Certainty assessment                                                                                                   |                   |              |                      |              |                          |                      | № of patients  |                | Effect                        |                                                      | Certainty    | Importance |
|------------------------------------------------------------------------------------------------------------------------|-------------------|--------------|----------------------|--------------|--------------------------|----------------------|----------------|----------------|-------------------------------|------------------------------------------------------|--------------|------------|
| № of studies                                                                                                           | Study design      | Risk of bias | Inconsistency        | Indirectness | Imprecision              | Other considerations | Bed rest       | control        | Relative (95% CI)             | Absolute (95% CI)                                    |              |            |
| Subgroup analysis: Association between bed rest (intervention) and preterm rupture of membranes in undeveloped regions |                   |              |                      |              |                          |                      |                |                |                               |                                                      |              |            |
| 3                                                                                                                      | randomised trials | not serious  | not serious          | not serious  | serious <sup>c</sup>     | none                 | 21/150 (14.0%) | 16/147 (10.9%) | <b>OR 1.32</b> (0.60 to 2.93) | <b>30 more per 1,000</b> (from 41 fewer to 155 more) | ⊕⊕⊕ MODERATE | CRITICAL   |
| Subgroup analysis: Association between bed rest (intervention) and preterm rupture of membranes in developed regions   |                   |              |                      |              |                          |                      |                |                |                               |                                                      |              |            |
| 1                                                                                                                      | randomised trials | not serious  | serious <sup>h</sup> | not serious  | not serious <sup>i</sup> | none                 | 13/69 (18.8%)  | 9/72 (12.5%)   | <b>OR 1.63</b> (0.65 to 4.09) | <b>64 more per 1,000</b> (from 40 fewer to 244 more) | ⊕⊕⊕ MODERATE | CRITICAL   |
| Association between bed rest (intervention) and GDM                                                                    |                   |              |                      |              |                          |                      |                |                |                               |                                                      |              |            |



| Certainty assessment |                   |              |                      |              |                          |                      | № of patients  |                | Effect                           |                                                        | Certainty       | Importance |
|----------------------|-------------------|--------------|----------------------|--------------|--------------------------|----------------------|----------------|----------------|----------------------------------|--------------------------------------------------------|-----------------|------------|
| № of studies         | Study design      | Risk of bias | Inconsistency        | Indirectness | Imprecision              | Other considerations | Bed rest       | control        | Relative (95% CI)                | Absolute (95% CI)                                      |                 |            |
| 1                    | randomised trials | not serious  | serious <sup>h</sup> | not serious  | not serious <sup>i</sup> | none                 | 3/69<br>(4.3%) | 3/72<br>(4.2%) | <b>OR 1.05</b><br>(0.20 to 5.37) | <b>2 more per 1,000</b><br>(from 33 fewer to 148 more) | ⊕⊕⊕<br>MODERATE | CRITICAL   |

**CI:** Confidence interval; **OR:** Odds ratio; **MD:** Mean difference

### Explanations

- a. Serious imprecision. The 95% CI crosses the line of no effect.
- b. Serious risk of bias. High risk of selection bias. Unclear risk of detection bias; it was unknown if the outcome assessments were blinded.
- c. Serious imprecision. The 95% CI crosses the line of no effect, and is wide, such that our recommendation would be different if the true effect were at one end of the CI or the other.
- d. Serious risk of bias. High risk of selection and reporting bias. Unclear risk of detection bias; it was unknown if the outcome assessments were blinded.
- e. Serious risk of bias. High risk of reporting bias. Unclear risk of selection bias; it was unknown if allocation concealment was adequate. Unclear risk of detection bias; it was unknown if the outcome assessment were blinded.
- f. Serious inconsistency because the heterogeneity was high ( $I^2 \geq 50\%$ )
- g. Serious risk of bias. High risk of reporting bias. Unclear risk of detection bias; it was unknown if the outcome assessments were blinded.
- h. Serious inconsistency because only one study

1  
2  
3  
4  
5  
6  
7  
8  
9  
10  
11  
12  
13  
14  
15  
16  
17  
18  
19  
20  
21  
22  
23  
24  
25  
26  
27  
28  
29  
30  
31  
32  
33  
34  
35  
36  
37  
38  
39  
40  
41  
42  
43  
44  
45  
46  
47

i. No serious imprecision; only one study but already downgraded for serious inconsistency for this reason

Confidential

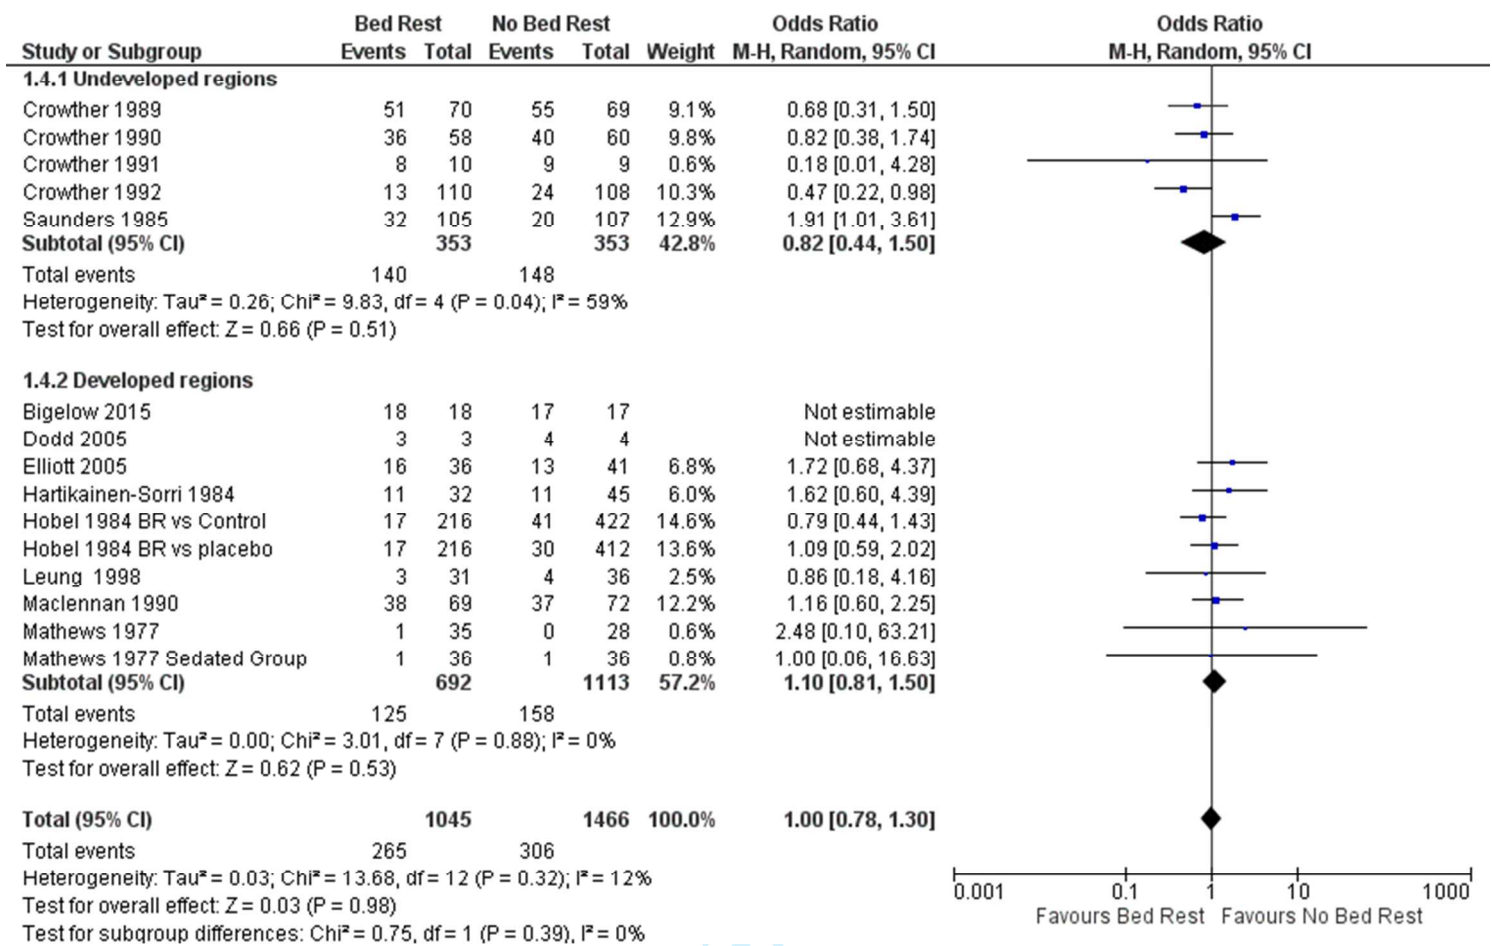

**ONLINE SUPPLEMENT FIGURE 1.** Effect of Bed rest (experimental) vs. non-bed rest (control) on prematurity <37 weeks. Bed rest did not significantly decrease prematurity <37 weeks in undeveloped regions or developed regions. OR = Odds Ratio; 95% confidence interval = [95% CI].

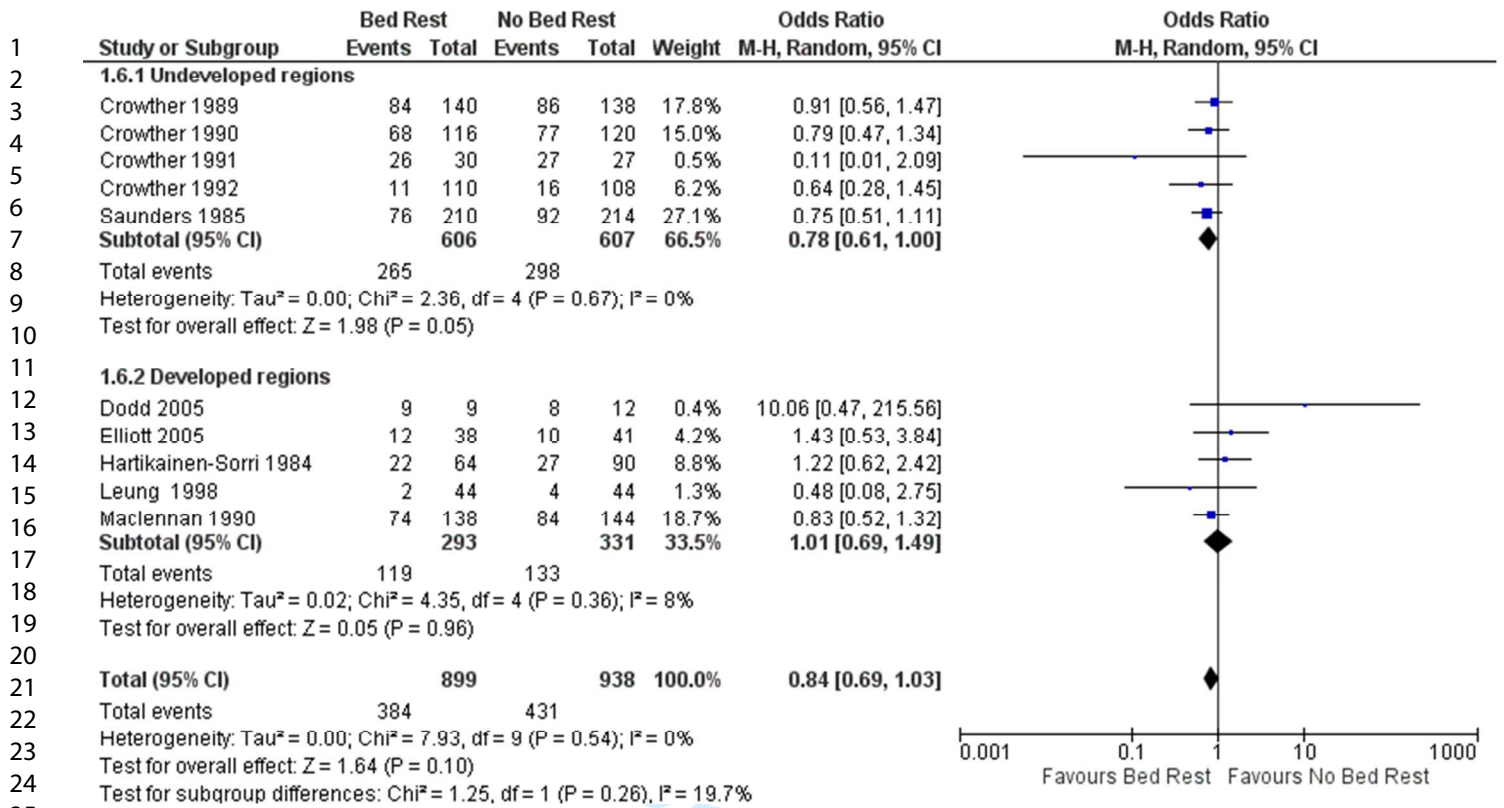

**ONLINE SUPPLEMENT FIGURE 2.** Effect of Bed rest (experimental) vs. non-bed rest (control) on birth weight <2500 grams. Bed rest decreased the rate of birth weight <2500 grams in pregnancies in undeveloped regions. OR = Odds Ratio; 95% confidence interval = [95% CI].

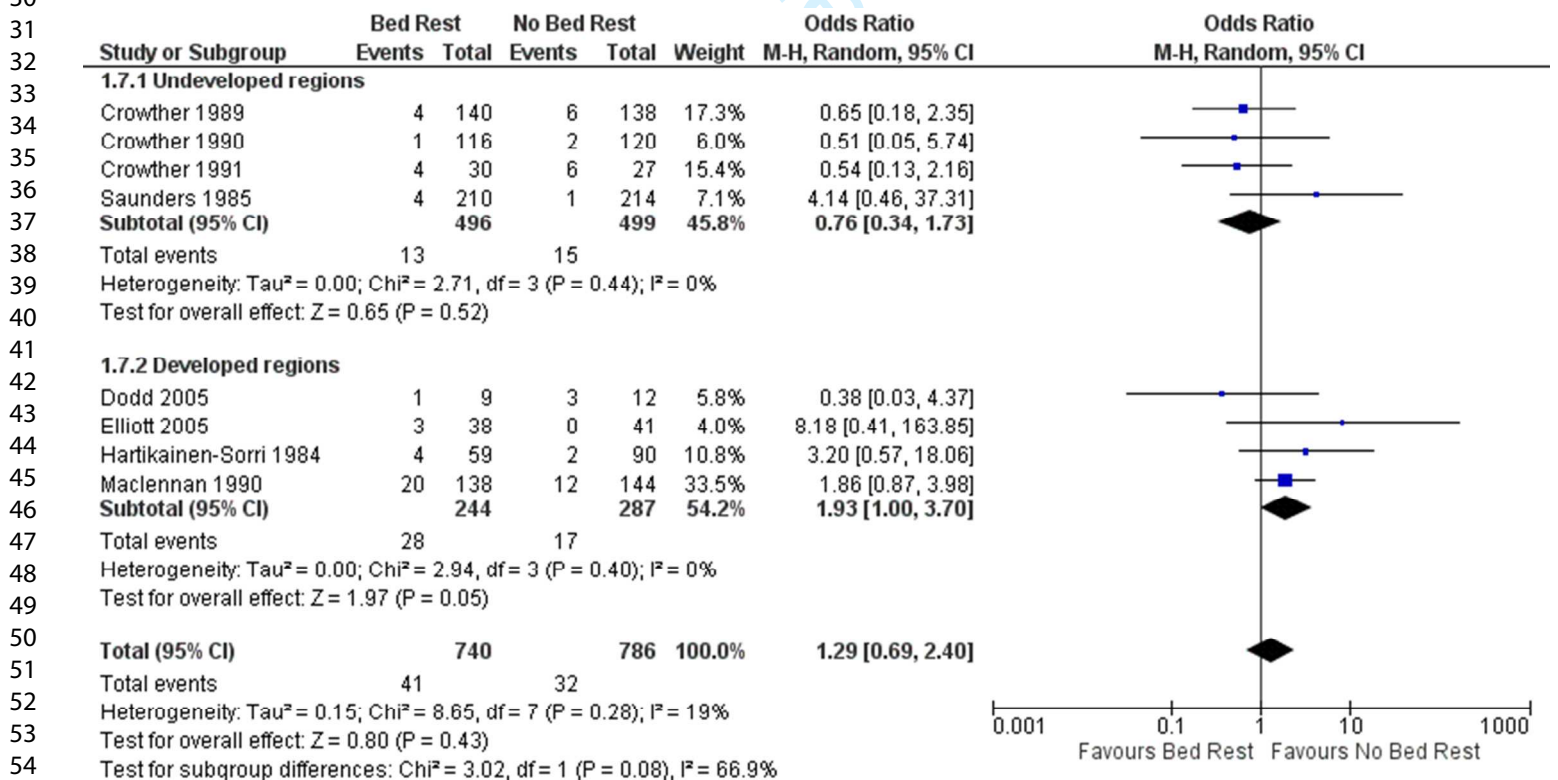

**ONLINE SUPPLEMENT FIGURE 3.** Effect of bed rest (experimental) vs. non-bed rest (control) on risk of birth weight <1500 grams. Bed rest significantly increased the risk of birth weight <1500 grams in pregnancies in developed regions. OR = Odds Ratio; 95% confidence interval = [95% CI].

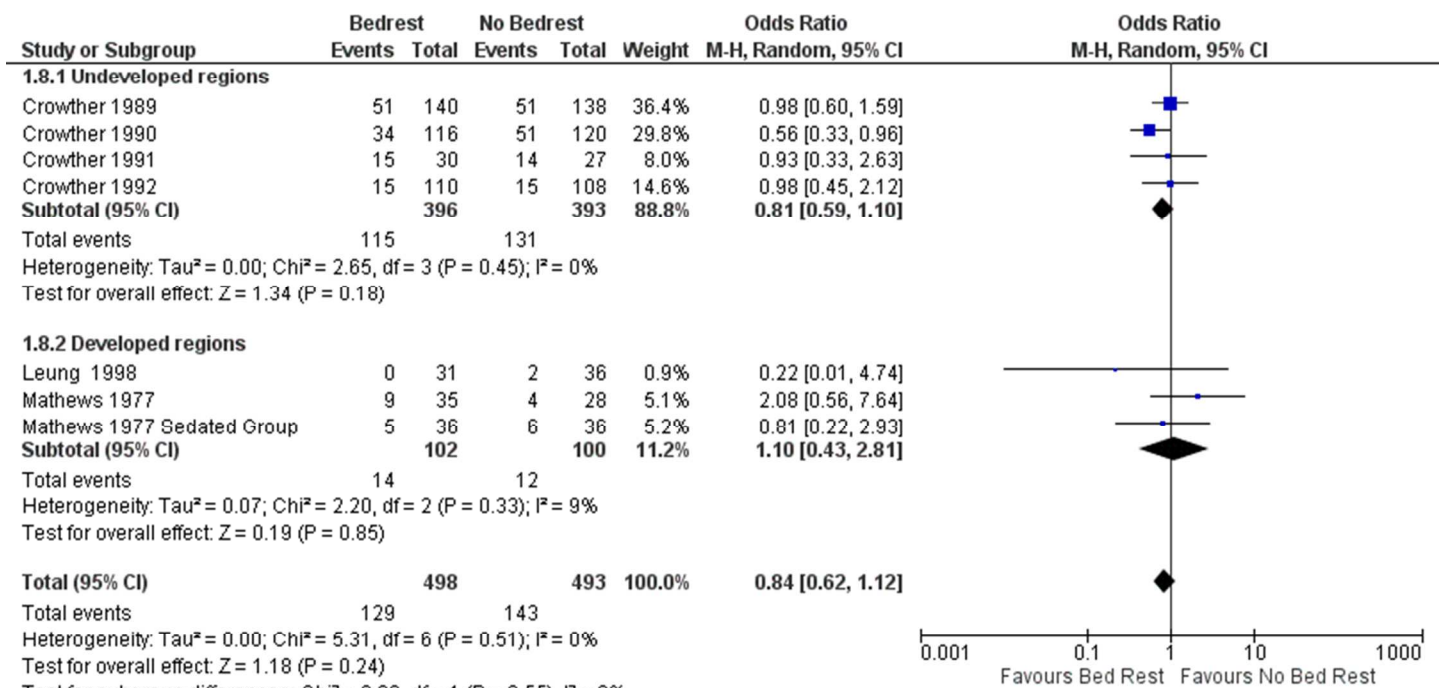

**ONLINE SUPPLEMENT FIGURE 4.** Effect of Bed rest (experimental) vs. non-bed rest (control) on small for gestational age. Small for gestational age was not different between groups in developed or undeveloped regions. OR = odds ratio; 95% confidence interval = [95% CI].

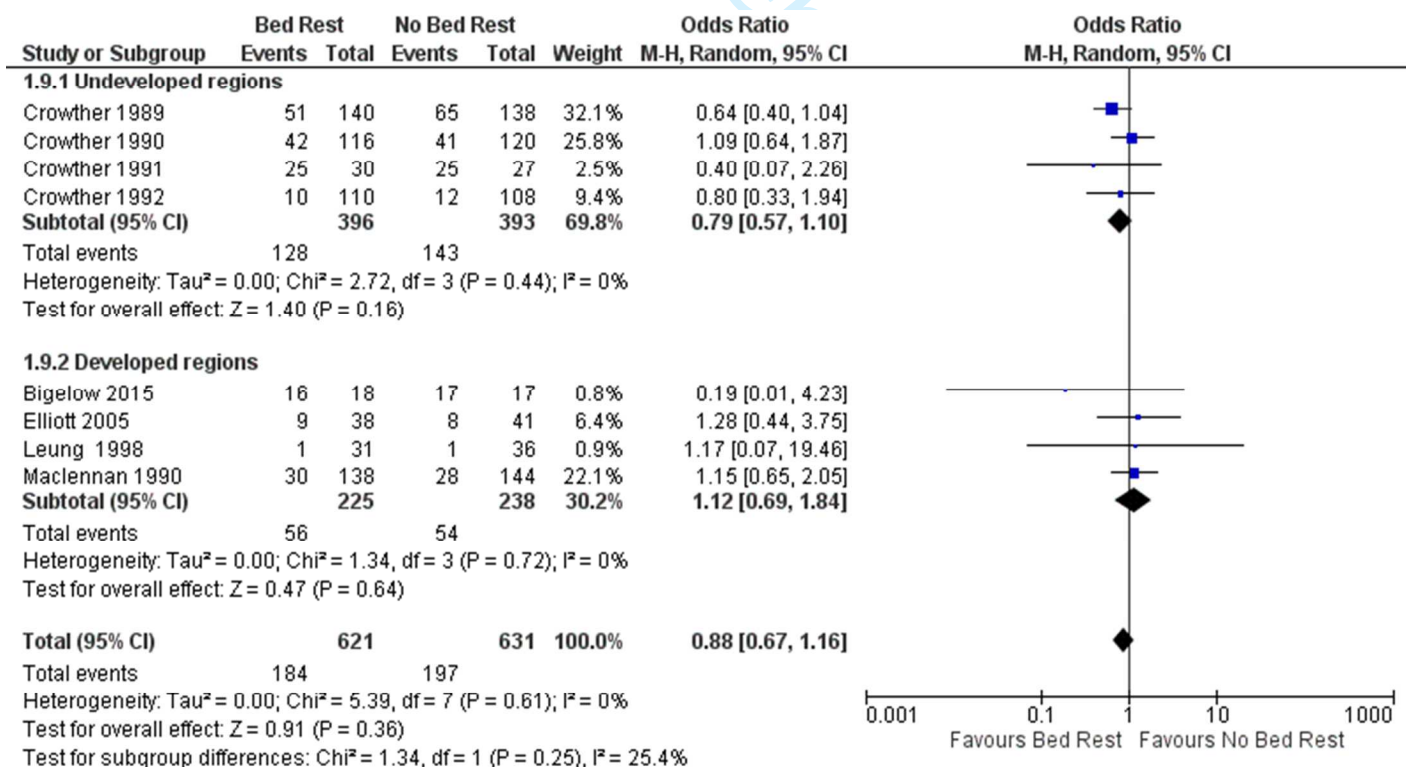

**ONLINE SUPPLEMENT FIGURE 5.** Effect of Bed rest (experimental) vs. non-bed rest (control) on admission to neonatal intensive care unit (NICU). Bed rest did not significantly decrease risk of admission to NICU in developed or undeveloped regions. OR = Odds Ratio; 95% confidence interval = [95% CI].

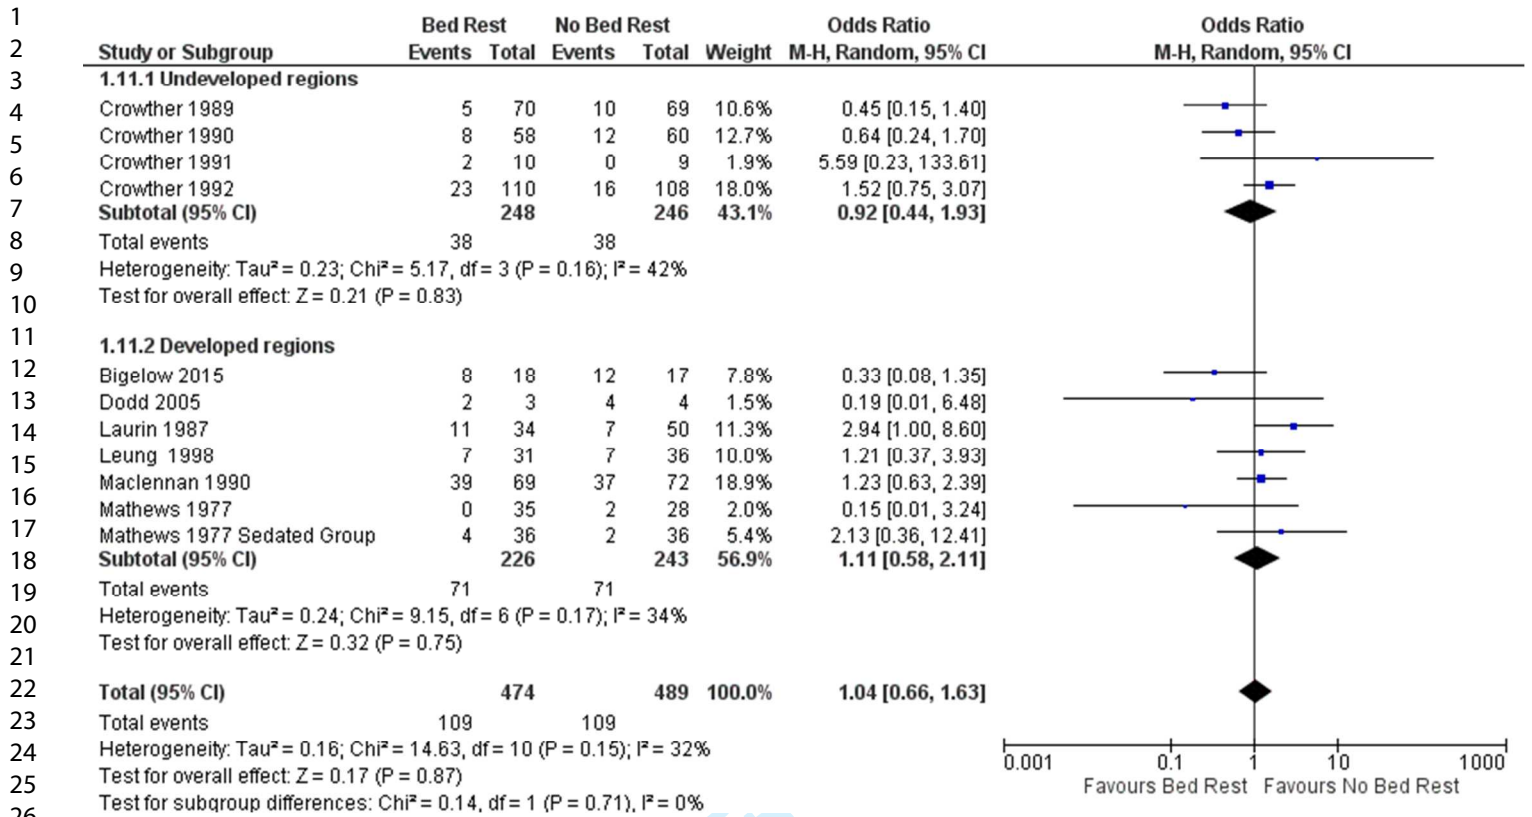

**ONLINE SUPPLEMENT FIGURE 6.** Effect of Bed rest (experimental) vs. non-bed rest (control) on C-section. Bed rest did not significantly decrease risk of C-section in developed or undeveloped regions. OR = Odds Ratio; 95% confidence interval = [95% CI].

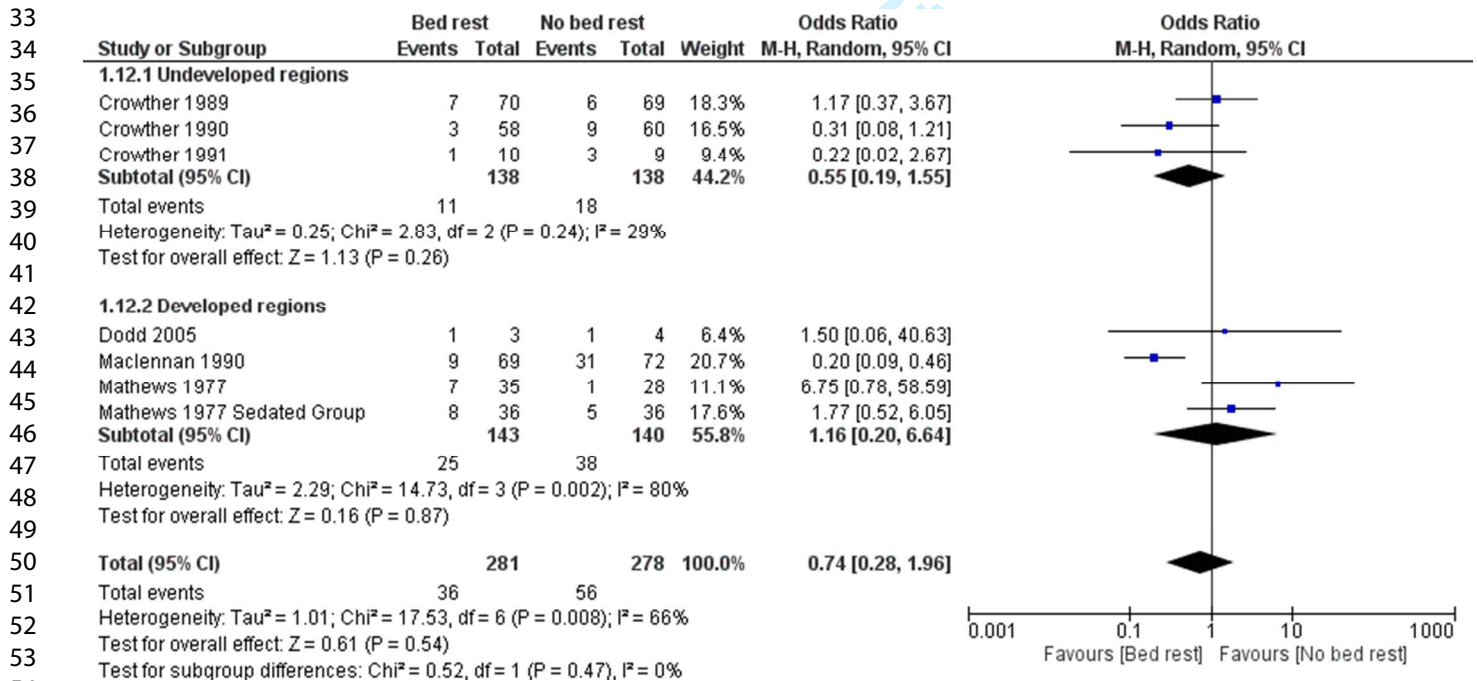

**ONLINE SUPPLEMENT FIGURE 7.** Effect of Bed rest (experimental) vs. non-bed rest (control) on pregnancy induce-hypertension. Bed rest significant reduce the risk of pregnancy induce-hypertension compared to non-bed rest. OR = Odds Ratio; 95% confidence interval = [95% CI].

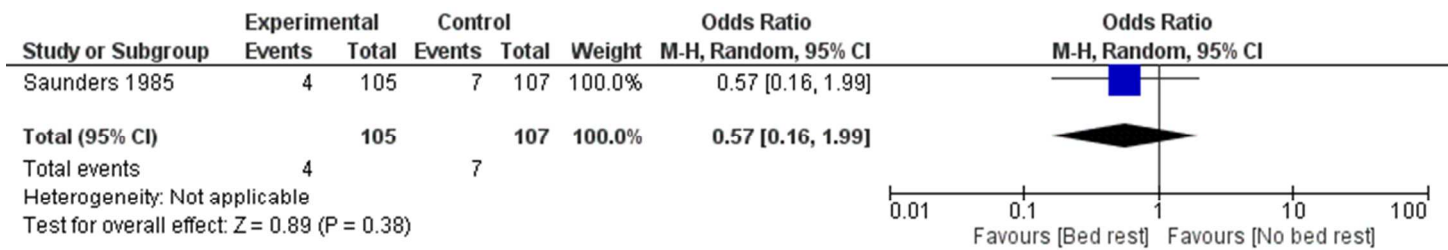

**ONLINE SUPPLEMENT FIGURE 8.** Effect of Bed rest (experimental) vs. non-bed rest (control) on pre-eclampsia. Bed rest did not significantly decrease risk of pre-eclampsia. OR = Odds Ratio; 95% confidence interval = [95% CI].

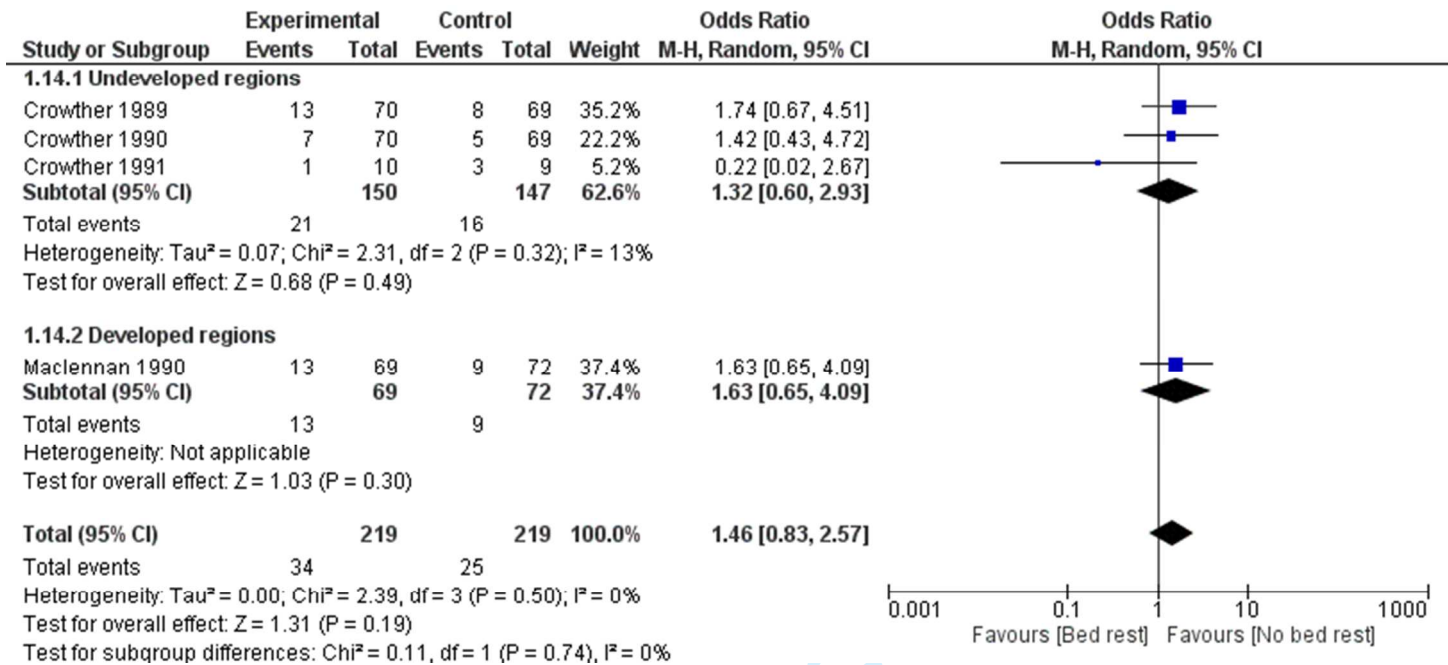

**ONLINE SUPPLEMENT FIGURE 9.** Effect of Bed rest (experimental) vs. non-bed rest (control) on PRM. Bed rest did not significantly decrease risk of PRM in developed or undeveloped regions. OR = Odds Ratio; 95% confidence interval = [95% CI].

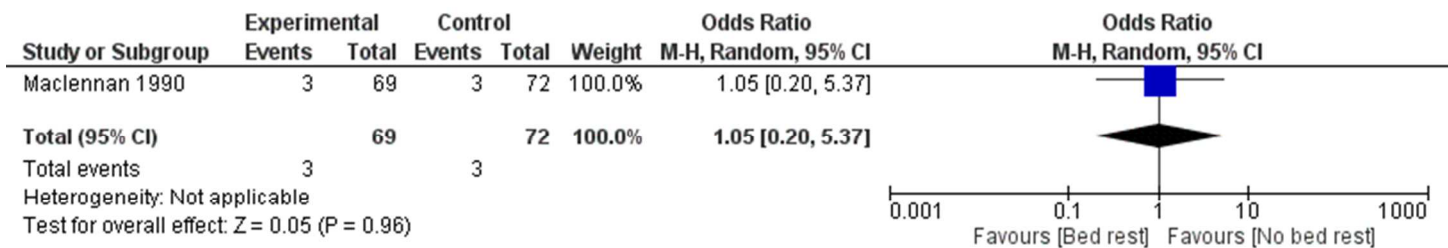

**ONLINE SUPPLEMENT FIGURE 10.** Effect of Bed rest (experimental) vs. non-bed rest (control) on GDM. Bed rest did not significantly decrease risk of GDM. OR = Odds Ratio; 95% confidence interval = [95% CI].

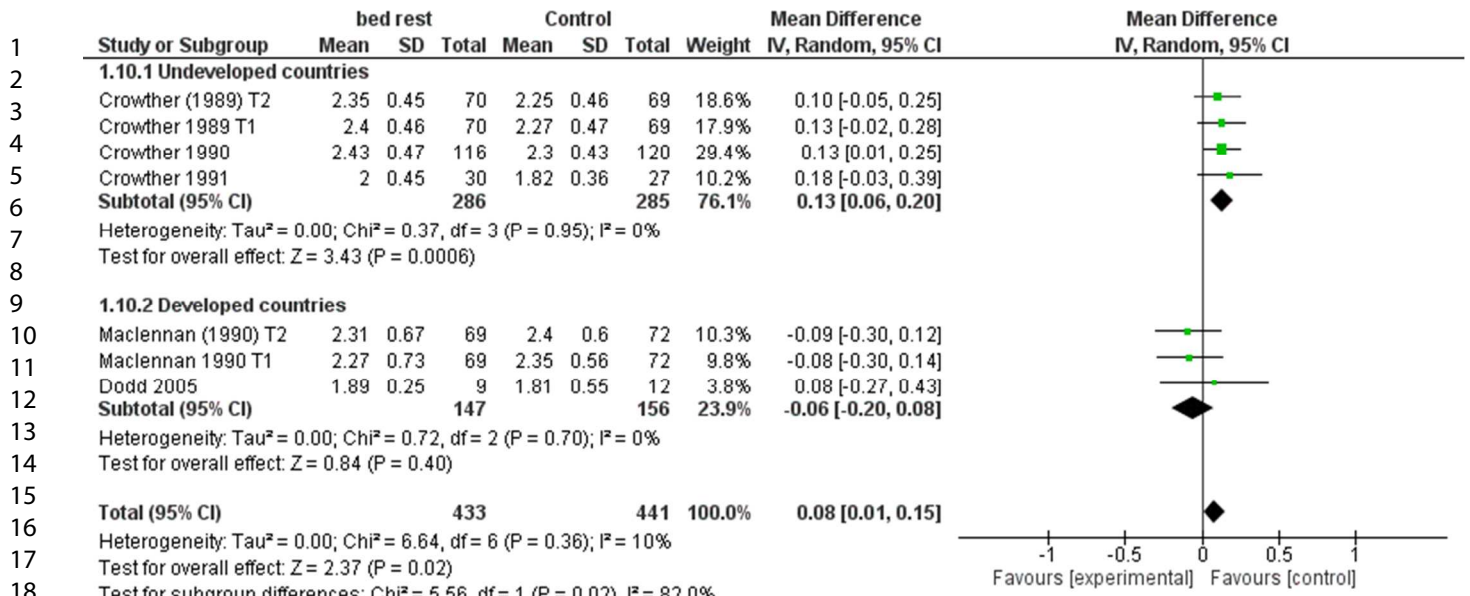

**ONLINE SUPPLEMENT FIGURE 11.** Effect of Bed rest (experimental) vs. non-bed rest (control) on birth weight in multiple gestation pregnancies. Bed rest resulted in a 130 gram increase in birth weight in undeveloped regions. WMD = weighted mean difference; 95% confidence interval = [95% CI].

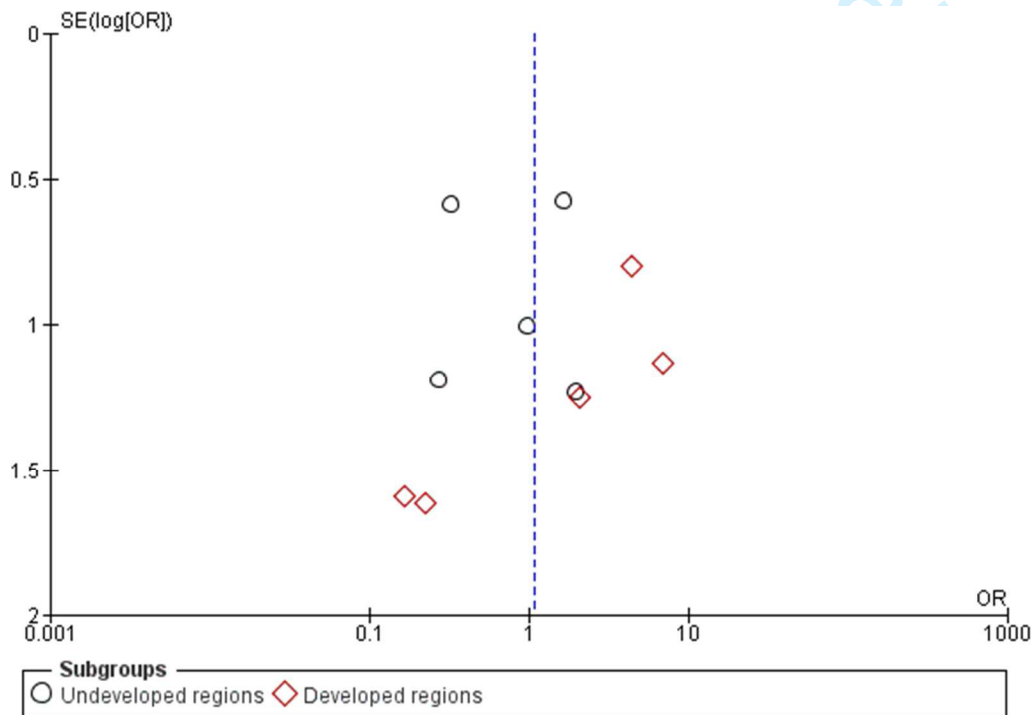



1 **ONLINE SUPPLEMENT FIGURE 12.** Funnel plot using 12 studies on perinatal death following maternal  
 2 prenatal  
 3 bedrest.  
 4  
 5

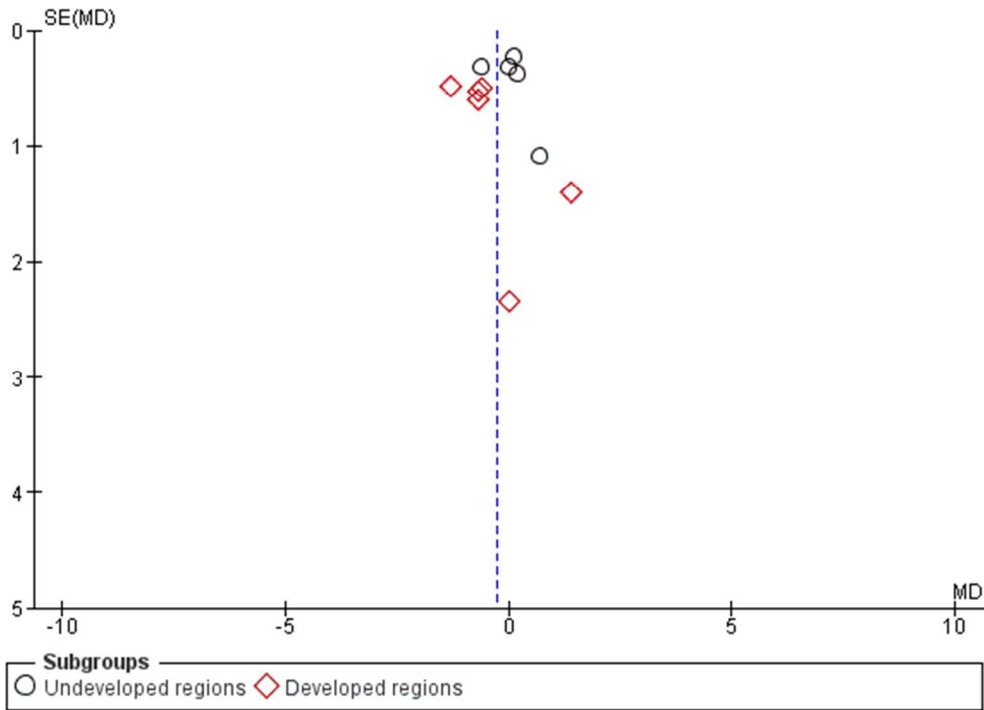

29 **ONLINE SUPPLEMENT FIGURE 13.** Funnel plot using 11 studies on gestational age at birth following  
 30 maternal prenatal bedrest.  
 31  
 32

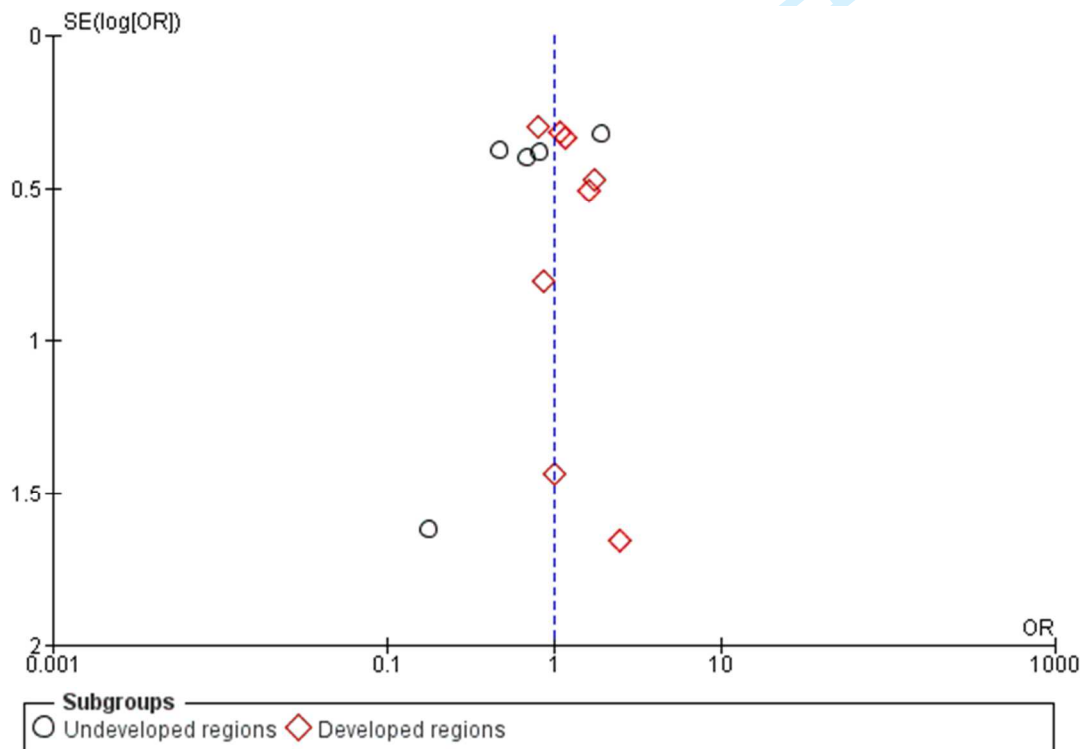

58 **ONLINE SUPPLEMENT FIGURE 14.** Funnel plot using 13 studies on premature birth (gestational age <37  
 59 weeks) following maternal prenatal bedrest.  
 60

1  
2  
3  
4  
5  
6  
7  
8  
9  
10  
11  
12  
13  
14  
15  
16  
17  
18  
19  
20  
21  
22  
23  
24  
25  
26  
27  
28  
29  
30  
31  
32  
33  
34  
35  
36  
37  
38  
39  
40  
41  
42  
43  
44  
45  
46  
47  
48  
49  
50  
51  
52  
53  
54  
55  
56  
57  
58  
59  
60

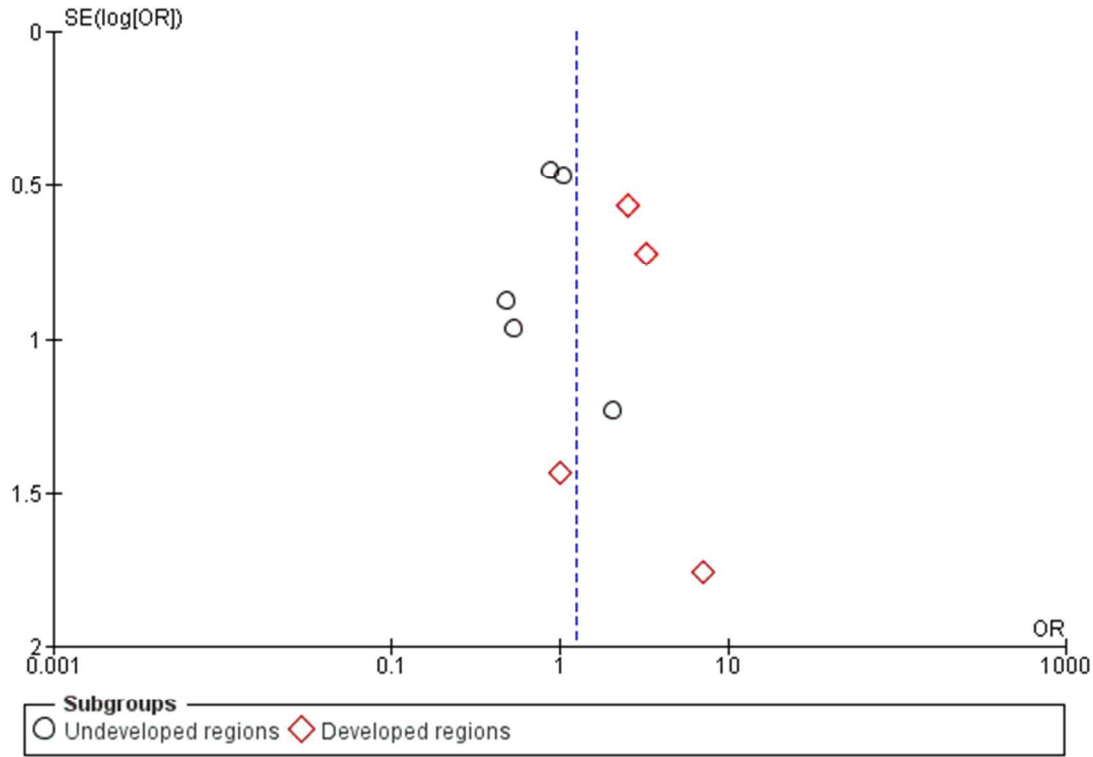

**ONLINE SUPPLEMENT FIGURE 15.** Funnel plot using 10 studies on very premature birth (author defined <35, 34, or 32 weeks gestational age) following maternal prenatal bedrest.

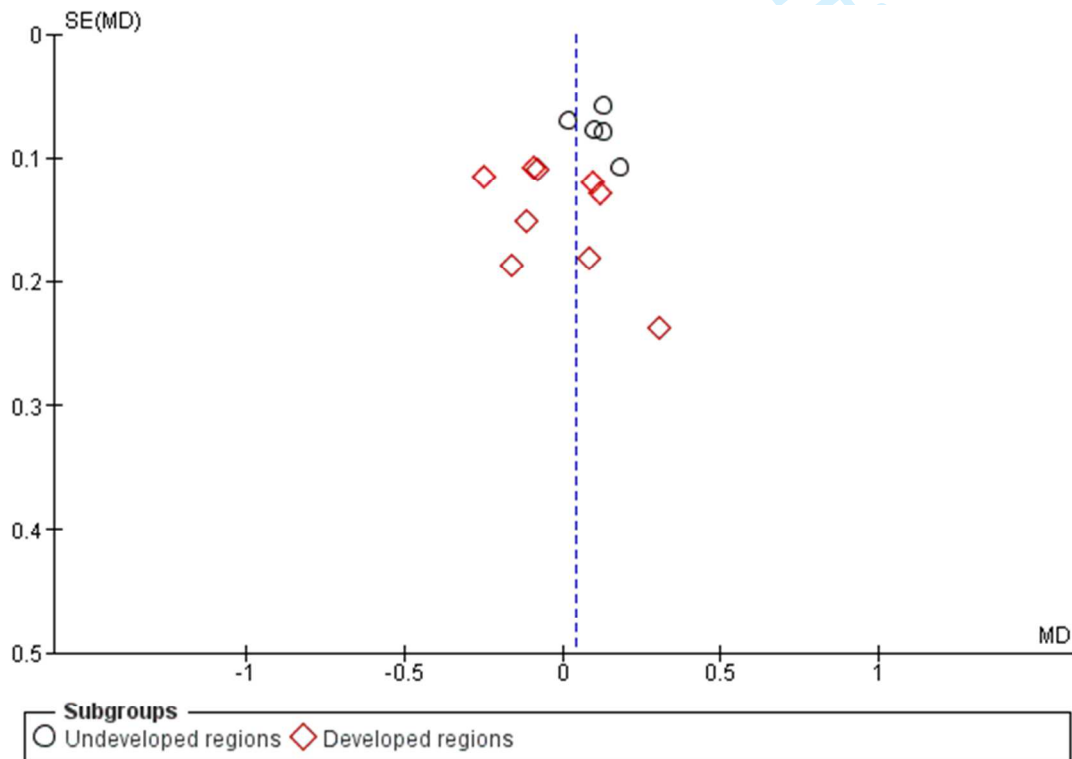

**ONLINE SUPPLEMENT FIGURE 16.** Funnel plot using 11 studies on infant birthweight following maternal prenatal bedrest.

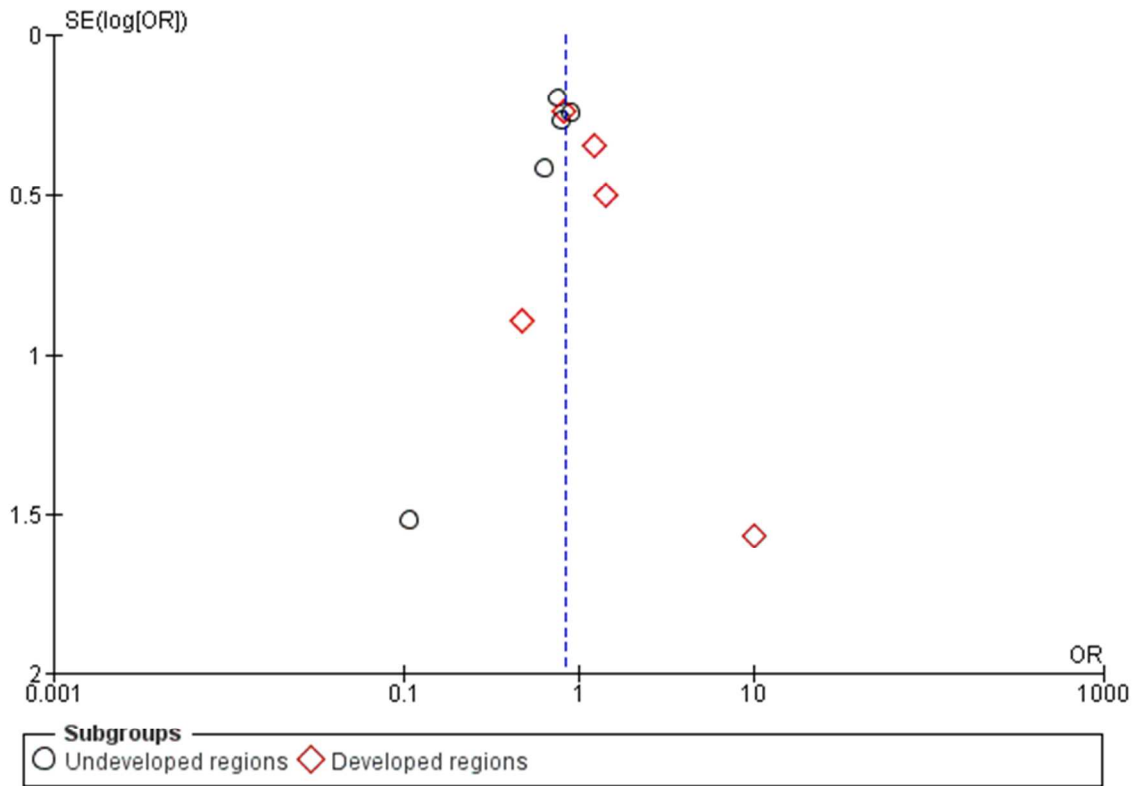

**ONLINE SUPPLEMENT FIGURE 17.** Funnel plot using 10 studies on birthweight <2500g following maternal prenatal bedrest.

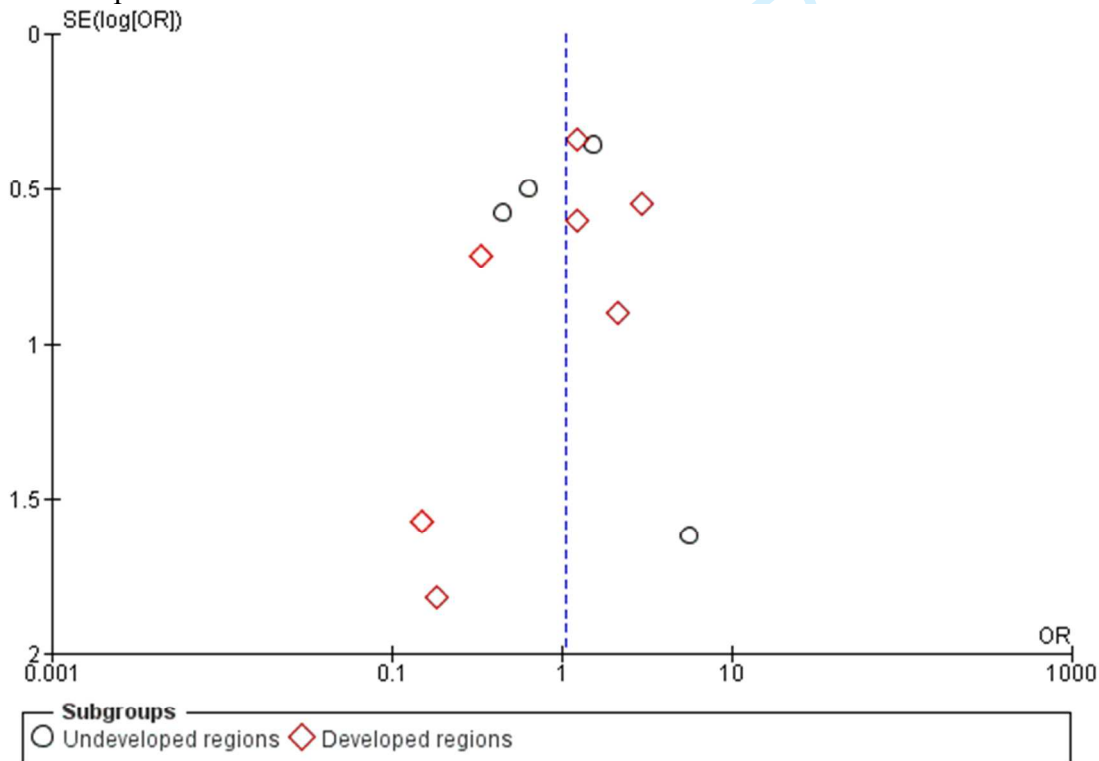

**ONLINE SUPPLEMENT FIGURE 18.** Funnel plot using 10 studies on C-section following maternal prenatal bedrest.

1  
2  
3  
4  
5  
6  
7  
8  
9  
10  
11  
12  
13  
14  
15  
16  
17  
18  
19  
20  
21  
22  
23  
24  
25  
26  
27  
28  
29  
30  
31  
32  
33  
34  
35  
36  
37  
38  
39  
40  
41  
42  
43  
44  
45  
46  
47  
48  
49  
50  
51  
52  
53  
54  
55  
56  
57  
58  
59  
60

Confidential

## Search Strategy Employed

### **Ovid Epub Ahead of Print, In-Process & Other Non-Indexed Citations and Ovid MEDLINE 1946 to Present**

1. exp Pregnancy Outcome/ or exp Fetus/ or exp Congenital Abnormalities/ or exp PrEGnancy Complications/ or exp PrEGnancy, High Risk/
2. ((pregnancy or birth or fetus or fetal or labo?r or deliver\* or maternal) adj3 outcome\*).ti,ab,kf.
3. (preterm or prematur\* or birth weight or small for gestational age or large for gestational age or miscarriage\* or spontaneous abortion\* or pre eclampsia or ((fetal or fetus or neonat\* or newborn\* or infant\* or congenital) adj3 abnormalit\*)).ti,ab,kf.
4. (high risk adj3 pregnancy).ti,ab,kf.
5. (gestational diabetes or (membrane\* adj2 ruptur\*) or ((perinatal or fetal or maternal or infant\* or neonat\* or newborn\*) adj2 (death or morality)) or polyhydramnios or caesarean or c-section).ti,ab,kf.
6. or/1-5
7. bone density/ or exp muscle strength/ or muscle tonus/ or exp Muscular Atrophy/
8. Depression/ or depressive disorder/ or depression, postpartum/ or depressive disorder, major/ or depressive disorder, treatment-resistant/ or dysthymic disorder/ or exp Anxiety disorders/
9. ((bone adj2 density) or muscl\* or muscular or depress\* or anxiety or metabolic).ti,ab,kf.
10. or/7-9
11. (pregnan\* or antenatal or prenatal or antepartum or prepartum or ante partum or pre partum).ti,ab,hw.
12. 10 and 11
13. 6 or 12
14. bed rest/ or (bed rest or bedrest or (activit\* adj3 restrict\*)).ti,ab,kf.
15. 13 and 14
16. ((pregnan\* or antenatal or prenatal or antepartum or prepartum or ante partum or pre partum) and (bed rest or bedrest or (activit\* adj3 restrict\*))).ti.
17. ((pregnan\* or antenatal or prenatal or antepartum or prepartum or ante partum or pre partum) adj3 (bed rest or bedrest or (activit\* adj3 restrict\*))).ab.
18. 15 or 16 or 17
19. (clinical trial or randomized controlled trial).pt.
20. (randomi?ed or placebo\* or randomly or trial or groups).ab.
21. intervention\*.mp.
22. 19 or 20 or 21
23. 18 and 22
24. animals/ not (humans/ and animals/)
25. 23 not 24

### **Ovid Cochrane Central Register of Controoled Trials**

1. exp Pregnancy Outcome/ or exp Fetus/ or exp Congenital Abnormalities/ or exp Pregnancy Complications/ or exp Pregnancy, High Risk/
2. ((pregnancy or birth or fetus or fetal or labo?r or deliver\* or maternal) adj3 outcome\*).ti,ab.

3. (preterm or prematur\* or birth weight or small for gestational age or large for gestational age or miscarriage\* or spontaneous abortion\* or pre eclampsia or ((fetal or fetus or neonat\* or newborn\* or infant\* or congenital) adj3 abnormalit\*)).ti,ab.
4. (high risk adj3 pregnancy).ti,ab.
5. (gestational diabetes or (membrane\* adj2 ruptur\*) or ((perinatal or fetal or maternal or infant\* or neonat\* or newborn\*) adj2 (death or morality)) or polyhydramnios or caesarean or c-section).ti,ab.
6. or/1-5
7. bone density/ or exp muscle strength/ or muscle tonus/ or exp Muscular Atrophy/
8. Depression/ or depressive disorder/ or depression, postpartum/ or depressive disorder, major/ or depressive disorder, treatment-resistant/ or dysthymic disorder/ or exp Anxiety disorders/
9. ((bone adj2 density) or muscl\* or muscular or depress\* or anxiety or metabolic).ti,ab.
10. or/7-9
11. (pregnan\* or antenatal or prenatal or antepartum or prepartum or ante partum or pre partum).ti,ab,hw.
12. 10 and 11
13. 6 or 12
14. bed rest/ or (bed rest or bedrest or (activit\* adj3 restrict\*)).ti,ab.
15. 13 and 14
16. ((pregnan\* or antenatal or prenatal or antepartum or prepartum or ante partum or pre partum) and (bed rest or bedrest or (activit\* adj3 restrict\*))).ti.
17. ((pregnan\* or antenatal or prenatal or antepartum or prepartum or ante partum or pre partum) adj3 (bed rest or bedrest or (activit\* adj3 restrict\*))).ab.
18. 15 or 16 or 17

### Ovid Cochrane database of SRs

1. ((pregnancy or birth or fetus or fetal or labo?r or deliver\* or maternal) adj3 outcome\*).ti,ab,kw.
2. (preterm or prematur\* or birth weight or small for gestational age or large for gestational age or miscarriage\* or spontaneous abortion\* or pre eclampsia or ((fetal or fetus or neonat\* or newborn\* or infant\* or congenital) adj3 abnormalit\*)).ti,ab,kw.
3. (high risk adj3 pregnancy).ti,ab,kw.
4. (gestational diabetes or (membrane\* adj2 ruptur\*) or ((perinatal or fetal or maternal or infant\* or neonat\* or newborn\*) adj2 (death or morality)) or polyhydramnios or caesarean or c-section).ti,ab,kw.
5. or/1-4
6. ((bone adj2 density) or muscl\* or muscular or depress\* or anxiety or metabolic).ti,ab,kw.
7. (pregnan\* or antenatal or prenatal or antepartum or prepartum or ante partum or pre partum).ti,ab,kw.
8. 6 and 7
9. 5 or 8
10. (bed rest or bedrest or (activit\* adj3 restrict\*)).ti,ab,kw.
11. 9 and 10
12. ((pregnan\* or antenatal or prenatal or antepartum or prepartum or ante partum or pre partum) and (bed rest or bedrest or (activit\* adj3 restrict\*))).ti.

- 1  
2  
3 13. ((pregnan\* or antenatal or prenatal or antepartum or prepartum or ante partum or pre partum)  
4 adj3 (bed rest or bedrest or (activit\* adj3 restrict\*))).ab,kw.  
5 14. 11 or 12 or 13  
6  
7

### 8 **Ovid Embase**

- 9  
10 1. exp Pregnancy Outcome/ or exp Fetus/ or exp Congenital Disorder/ or exp Pregnancy  
11 Complication/ or exp High Risk Pregnancy/  
12 2. ((pregnancy or birth or fetus or fetal or labo?r or deliver\* or maternal) adj3 outcome\*).ti,ab.  
13 3. (preterm or prematur\* or birth weight or small for gestational age or large for gestational age  
14 or miscarriage\* or spontaneous abortion\* or pre eclampsia or ((fetal or fetus or neonat\* or  
15 newborn\* or infant\* or congenital) adj3 abnormalit\*)).ti,ab.  
16 4. (high risk adj3 pregnancy).ti,ab.  
17 5. (gestational diabetes or (membrane\* adj2 ruptur\*) or ((perinatal or fetal or maternal or infant\*  
18 or neonat\* or newborn\*) adj2 (death or morality)) or polyhydraminos or caesarean or c-  
19 section).ti,ab.  
20 6. or/1-5  
21 7. bone density/  
22 8. muscle strength/ or muscle atrophy.mp. [mp=title, abstract, original title, name of substance  
23 word, subject heading word, keyword heading word, protocol supplementary concept word, rare  
24 disease supplementary concept word, unique identifier]  
25 9. exp muscle tone/  
26 10. exp depression/  
27 11. ((bone adj2 (density or deminerali\*)) or muscl\* or muscular or depress\* or anxiety or  
28 metabolic).ti,ab.  
29 12. exp anxiety disorder/  
30 13. or/7-12  
31 14. (pregnan\* or antenatal or prenatal or antepartum or prepartum or ante partum or pre  
32 partum).ti,ab,hw.  
33 15. 13 and 14  
34 16. 6 or 15  
35 17. bed rest/ or (bed rest or bedrest or (activit\* adj3 restrict\*)).ti,ab.  
36 18. 16 and 17  
37 19. ((pregnan\* or antenatal or prenatal or antepartum or prepartum or ante partum or pre partum)  
38 and (bed rest or bedrest or (activit\* adj3 restrict\*))).ti.  
39 20. ((pregnan\* or antenatal or prenatal or antepartum or prepartum or ante partum or pre partum)  
40 adj3 (bed rest or bedrest or (activit\* adj3 restrict\*))).ab.  
41 21. 18 or 19 or 20  
42 22. limit 21 to (clinical trial or randomized controlled trial or controlled clinical trial)  
43 23. (randomi?ed or placebo\* or randomly or trial or groups).ab.  
44 24. intervention\*.mp.  
45 25. 23 or 24  
46 26. 21 and 25  
47 27. 22 or 26  
48 28. animals/ not (humans/ and animals/)  
49 29. 27 not 28  
50  
51  
52  
53  
54  
55  
56  
57  
58  
59  
60

**ClinicalTrials.gov**

1. Bed rest
2. Bedrest

Recruitment: Closed Studies

Study Results: Studies with Results

**Scopus**

( TITLE-ABS-KEY ( ( pregnancy OR birth OR maternal OR fetus OR fetal OR perinatal ) W/2 ( complication\* OR outcome\* OR "high risk" ) ) OR ( ( fetus OR fetal OR perinatal OR neonat\* OR infant\* OR maternal ) W/2 ( death OR mortality ) ) OR ( ( fetus OR fetal OR perinatal OR neonat\* OR infant\* OR congenital ) W/2 ( abnormalit\* ) ) OR ( membrane\* W/2 ruptur\* ) OR preterm OR prematur\* OR "birth weight" OR "small for gestational age" OR "large for gestational age" OR miscarriage\* OR "spontaneous abortion\*" OR "pre eclampsia" OR "gestational diabetes" ) OR TITLE-ABS-KEY ( ( bone W/2 ( density OR demineralization ) ) OR muscl\* OR muscular OR depression OR depressive OR anxiety ) AND TITLE-ABS-KEY ( pregnan\* OR deliver\* OR prenatal OR antenatal OR perinatal OR prepartum OR antepartum OR "pre partum" OR "ante partum" ) ) AND TITLE-ABS-KEY ( ( bedrest OR "bed rest" OR "activity restriction" OR "restricted activity" ) ) OR TITLE-ABS-KEY ( ( bedrest OR "bed rest" OR "activity restriction" OR "restricted activity" ) ) AND ( pregnan\* OR prenatal OR antenatal OR perinatal OR prepartum OR antepartum OR "pre partum" OR "ante partum" ) ) AND TITLE-ABS-KEY ( random\* OR groups OR placebo\* OR trial OR intervention\* )

**Web of Science Core Collection**

((TS=(( pregnancy OR birth OR maternal OR fetus OR fetal OR perinatal ) NEAR/2 ( complication\* OR outcome\* OR "high risk" )) OR TS=((fetus OR fetal OR perinatal OR neonat\* OR infant\* OR congenital ) NEAR/2 abnormalit\* ) OR TS=(preterm OR prematur\* OR "birth weight" OR "small for gestational age" OR "large for gestational age" OR miscarriage\* OR "spontaneous abortion\*" OR "pre eclampsia" OR "gestational diabetes") OR TS=(bone NEAR/2 ( density OR demineralization ) OR muscl\* OR muscular OR depression OR depressive OR anxiety ) AND TS=(pregnan\* OR prenatal OR antenatal OR perinatal OR prepartum OR antepartum OR "pre partum" OR "ante partum")) AND TS=(bedrest or "bed rest" or activit\* near/2 restrict\*) OR TS=(bedrest or "bed rest" or activit\* near/2 restrict\*) AND TS=( pregnancy OR birth OR maternal OR fetus OR fetal OR perinatal)) AND TS=(random\* OR groups OR placebo\* OR trial OR intervention\*)

**EBSCO Host CINAHL Plus**



1  
2  
3 S1 –(MH "Bed Rest") or "bed rest" or bedrest activit\* n3 restrict\*

4 S2 – ((MH "Pregnancy Outcomes") OR (MH "Pregnancy Complications+") OR (MH "Fetus+")  
5 OR (MH "Fetal Abnormalities") OR (MH "Pregnancy, High Risk") ) OR ( (pregnancy or birth or  
6 fetus or fetal or labo?r or deliver\* or maternal) n3 outcome\* ) OR ( preterm or prematur\* or birth  
7 weight or small for gestational age or large for gestational age or miscarriage\* or spontaneous  
8 abortion\* or "pre eclampsia" or "gestational diabetes" or ((fetal or fetus or neonat\* or newborn\*  
9 or infant\* or congenital) n3 abnormalit\* ) OR high risk w3 pregnancy

10 S3 – S1 AND S2

11 S4 – ((MH "Bone Density") OR (MH "Depression+") OR (MH "Anxiety Disorders+") OR (MH  
12 "Muscle Strength+") OR (MH "Muscle Weakness") OR (MH "Muscular Atrophy+") OR (MH  
13 "Muscle Tonus") ) OR ( muscul\* or muscular or depress\* or anxiety or metabolic )

14 S5 - pregnan\* or antenatal or prenatal or antepartum or prepartum or "ante partum" or "pre  
15 partum"

16 S6 - S4 AND S5

17 S7 - S2 OR S6

18 S8 – S1 AND S7

19 S9 – TI (( (pregnan\* or antenatal or prenatal or antepartum or prepartum or "ante partum" or "pre  
20 partum") and ("bed rest" or bedrest or (activit\* n3 restrict\*)) ) OR ( (pregnan\* or antenatal or  
21 prenatal or antepartum or prepartum or "ante partum" or "pre partum") w3 ("bed rest" or bedrest  
22 or (activit\* n3 restrict\*)) )

23 S10 – S8 OR S9  
24  
25  
26  
27  
28  
29  
30  
31  
32  
33  
34  
35  
36  
37  
38  
39  
40  
41  
42  
43  
44  
45  
46  
47  
48  
49  
50  
51  
52  
53  
54  
55  
56  
57  
58  
59  
60
